# Supplementary material for: Small changes, big gains: A curriculum-wide study of teaching practices and student learning in undergraduate biology
Source: PubMed Central journal article supplement (PMC6713325; doi:10.1371/journal.pone.0220900), 2019-08-28
Supplement: pone.0220900.s003.pdf [file pone.0220900.s003.pdf]

1  
2  
3  
4  
5  
6  
7  
8  
9  
10  
11  
12  
13  
14  
15  
16  
17  
18  
19  
20  
21  
22

Small changes, big gains: a curriculum-wide study of teaching practices and student learning in  
undergraduate biology

Laura K. Weir<sup>1#a\*</sup>, Megan K. Barker<sup>1,#b</sup>, Lisa M. McDonnell<sup>1,#c</sup>, Natalie G. Schimpf<sup>1,#d</sup>, Tamara  
M. Rodela<sup>1,#e</sup> and Patricia M. Schulte<sup>1,#d</sup>

<sup>1</sup>Carl Wieman Science Education Initiative, University of British Columbia, Vancouver, British  
Columbia, Canada

<sup>#a</sup>Department of Biology, Saint Mary's University, Halifax, Nova Scotia, Canada

<sup>#b</sup>Department of Biological Sciences, Simon Fraser University, Burnaby, British Columbia,  
Canada

<sup>#c</sup>Section of Cell and Developmental Biology, University of California San Diego, La Jolla,  
California, United States of America

<sup>#d</sup>Department of Zoology, University of British Columbia, Vancouver, British Columbia, Canada

<sup>#e</sup>Department of Biology, St. Francis Xavier University, Antigonish, Nova Scotia, Canada

\*Corresponding author

E-mail:laura.weir@smu.ca (LW)

## 23 **Supplementary methods**

### 24 **Diagnostic test analysis**

25 Discrimination index values were calculated for each question using post-test scores, using the  
26 following formula:

$$27 \frac{(\# \text{students correct within upper group}) - (\# \text{students correct within lower group})}{(\# \text{students per group})}$$

28 Upper and lower groups were the top and bottom 27% of the section population [1], based on  
29 their entire post-test score. For each test administered, a mean discrimination index was  
30 calculated from the discrimination indexes of each question. A discrimination index value can  
31 range from -1 to +1, with values higher than +0.2 considered fair to good [2]. The mean  
32 discrimination index of all tests ranged from 0.32 to 0.55 (overall mean for all tests  $0.42 \pm 0.22$   
33 (SD), median 0.41). Discrimination index summary and analysis results can be found in Table  
34 S1 and Fig S1.

35

### 36 **Effect size calculations**

37 The effect size of the difference between pre- and post-test scores within each class section was  
38 calculated using the standardized mean gain according to Lipsey and Wilson [3]. The equation  
39 for this effect size (ES) metric is:

$$40 \quad ES = \frac{\bar{G}}{s_g / \sqrt{2(1-r)}}$$

41 where  $\bar{G}$  is the mean post-test minus pre-test gain score within a given section,  $s_g$  is the standard  
42 deviation of the gain scores, and  $r$  is the correlation between pre-test and post-test scores.

43 **References**

- 44 1. Kelley TL. The selection of upper and lower groups for the validation of test items. *J Educ*  
45 *Psychol.* 1939;30: 17–24.
- 46 2. Ebel RL, Frisbie DA. *Essentials of educational measurement.* Englewood Cliffs, NJ:  
47 Prentice-Hall; 1986.
- 48 3. Lipsey MW, Wilson DB. *Practical Meta-Analysis.* Thousand Oaks, CA: Sage  
49 Publications; 2001.
