# Supplementary material for: Small changes, big gains: A curriculum-wide study of teaching practices and student learning in undergraduate biology
Source: PubMed Central journal article supplement (PMC6713325; doi:10.1371/journal.pone.0220900), 2019-08-28
Supplement: pone.0220900.s004.pdf [file pone.0220900.s004.pdf]

**S1 Table. Summary of concept inventory test sizes and question sources.**

| Course Level | Number of Students | Lower or Upper Division | Total No. of Questions | No. Home-made questions | No. Validated Questions | No. Modified Validated Questions | Question sources |
|--------------|--------------------|-------------------------|------------------------|-------------------------|-------------------------|----------------------------------|------------------|
| 100          | 1160               | L                       | 8                      | 1                       | 6                       | 1                                | 1                |
| 100          | 1900               | L                       | 23                     | 4                       | 3                       | 16                               | 2-7              |
| 200          | 1209               | L                       | 9                      | 4                       | 4                       | 1                                | 1, 8, 9          |
| 200          | 551                | L                       | 10                     | 6                       | 3                       | 1                                | 1, 10, 11        |
| 200          | 497                | L                       | 14                     | 3                       | 6                       | 5                                | 2, 6, 12         |
| 200          | 277                | L                       | 17                     | 7                       | 4                       | 6                                | 8, 10, 13-15     |
| 300          | 120                | U                       | 8                      | 0                       | 8                       | 0                                | 7                |
| 300          | 238                | U                       | 10                     | 4                       | 6                       | 0                                | 16,17            |
| 300          | 219                | U                       | 12                     | 5                       | 5                       | 2                                | 2,11,12          |
| 300          | 227                | U                       | 6                      | 6                       | 0                       | 0                                | none             |
| 300          | 73                 | U                       | 8                      | 5                       | 2                       | 1                                | 9, 11            |
| 400          | 19                 | U                       | 12                     | 4                       | 6                       | 1                                | 11               |
| 400          | 12                 | U                       | 8                      | 5                       | 2                       | 1                                | 9, 11            |
| 400          | 35                 | U                       | 20                     | 11                      | 5                       | 4                                | 2, 6, 11, 12     |

## References

1. Shi J, Wood W, Martin J, Guild N, Vicens Q, Knight JK. A diagnostic assessment for introductory molecular biology. *Cell Biol Educ.* 2010;9: 453–461. doi:10.1187/cbe.10
2. Smith MK, Wood WB, Knight JK. The Genetics Concept Assessment: a new concept inventory for gauging student understanding of genetics. *CBE Life Sci Educ.* 2008;7: 422–430. doi:10.1187/cbe.08
3. Abraham JK, Perez KE, Price RM. The dominance concept inventory: A tool for assessing undergraduate student alternative conceptions about dominance in mendelian and population genetics. *CBE Life Sci Educ.* 2014;13: 349–358. doi:10.1187/cbe.13-08-0160
4. Price RM, Andrews TC, McElhinny TL, Mead LS, Abraham JK, Thanukos A, et al. The genetic drift inventory: A tool for measuring what advanced undergraduates have mastered about genetic drift. *CBE Life Sci Educ.* 2014;13: 65–75. doi:10.1187/cbe.13-08-0159
5. Baum DA. The Tree-Thinking Challenge. *Science.* 2005;310: 979–980. doi:10.1126/science.1117727
6. Kalas P, O’Neill A, Pollock C, Birol G. Development of a meiosis concept inventory. *CBE Life Sci Educ.* 2013;12: 655–664. doi:10.1187/cbe.12-10-0174

7. Hansen M. Population Dynamics Concept Inventory [Internet]. 2013. Available: <http://q4b.biology.ubc.ca/concept-inventories/population-dynamics/>
8. Klymkowsky MW, Underwood SM, Garvin-Doxas RK. Biological Concepts Instrument (BCI): A diagnostic tool for revealing student thinking. arXiv:10124501. 2010; doi:abs/1012.4501
9. Deane T, Nomme K, Jeffery E, Pollock C, Birol G. Development of the biological experimental design concept inventory (BEDCI). *CBE Life Sci Educ*. 2014;13: 540–551. doi:10.1187/cbe.13-11-0218
10. Maskiewicz AC, Griscom HP, Welch NT. Using targeted active-learning exercises and diagnostic question clusters to improve students' understanding of carbon cycling in ecosystems. *CBE Life Sci Educ*.
11. Couch BA, Wood WB, Knight JK. The molecular biology capstone assessment: A concept assessment for upper-division molecular biology students. *CBE Life Sci Educ*. 2015;14: 1–11. doi:10.1187/cbe.14-04-0071
12. Taylor J, Oh-McGinnis R, Chowrira S, Smith K. Transcription and Translation Concept Inventory [Internet]. 2013. Available: <http://q4b.biology.ubc.ca/concept-inventories/transcription-and-translation/>
13. Michael JA, Wenderoth MP, Modell HI, Cliff W, Horwitz B, McHale P, et al. Undergraduates' understanding of cardiovascular phenomena. *Adv Physiol Educ*. 2002;26: 72–84. doi:10.1152/advan.00002.2002
14. Michael JA, Richardson D, Rovick A, Modell H, Bruce D, Horwitz B, et al. Undergraduate students' misconceptions about respiratory physiology. *Adv Physiol Educ*. 1999;22: S127–S135. Available: <http://advan.physiology.org/content/277/6/S127>
15. Fisher KM, Williams KS, Lineback JE. Osmosis and diffusion conceptual assessment. *CBE Life Sci Educ*. 2011;10: 418–429. doi:10.1187/cbe.11-04-0038
16. Knudson D, Noffal G, Bauer J, McGinnis P, Bird M, Chow J, et al. Development and evaluation of a biomechanics concept inventory. *Sports Biomech*. 2003;2: 267–77. doi:10.1080/14763140308522823
17. Martin J, Mitchell J, Newell T. Development of a concept inventory for fluid mechanics. *33rd Annu Front Educ 2003 FIE 2003*. 2003;1: 23–28. doi:10.1109/FIE.2003.1263340
