# Supplementary material for: Small changes, big gains: A curriculum-wide study of teaching practices and student learning in undergraduate biology
Source: PubMed Central journal article supplement (PMC6713325; doi:10.1371/journal.pone.0220900), 2019-08-28
Supplement: pone.0220900.s005.pdf [file pone.0220900.s005.pdf]

**S2 Table. Correlation matrix for all COPUS categories.**

|      | SL     | Sind  | SCG    | SWG          | SOG          | SGW          | SANQ   | SQ          | SWC    | SPrd  | SP          | SW    | SO           | Ilec         | IRtW         | IFUp         | IPQ         | ICQ         | IAnQ        | IMG          | Ilo1         | IDV          | Iadm  | IW          | IO           |      |
|------|--------|-------|--------|--------------|--------------|--------------|--------|-------------|--------|-------|-------------|-------|--------------|--------------|--------------|--------------|-------------|-------------|-------------|--------------|--------------|--------------|-------|-------------|--------------|------|
| SL   |        | -0.03 | 0.04   | <b>-0.58</b> | <b>-0.53</b> | <b>-0.66</b> | 0.05   | 0.24        | -0.12  | 0.06  | -0.10       | -0.08 | <b>-0.38</b> | <b>0.76</b>  | -0.22        | -0.17        | 0.01        | 0.01        | 0.21        | <b>-0.77</b> | <b>-0.67</b> | <b>0.50</b>  | 0.18  | -0.08       | <b>-0.61</b> | SL   |
| Sind | 0.89   |       | 0.24   | 0.15         | 0.09         | 0.21         | 0.10   | -0.02       | 0.01   | 0.27  | -0.13       | -0.09 | 0.23         | -0.23        | 0.14         | 0.27         | 0.21        | <b>0.39</b> | -0.03       | 0.07         | -0.25        | 0.08         | 0.23  | -0.19       | 0.31         | Sind |
| SCG  | 0.82   | 0.20  |        | 0.08         | -0.08        | <b>0.58</b>  | -0.07  | 0.04        | -0.12  | -0.18 | -0.22       | 0.25  | -0.08        | 0.02         | -0.26        | 0.24         | 0.09        | <b>0.95</b> | 0.17        | -0.09        | -0.02        | -0.06        | 0.19  | <b>0.50</b> | -0.08        | SCG  |
| SWG  | <0.001 | 0.42  | 0.67   |              | -0.08        | <b>0.49</b>  | -0.13  | -0.11       | 0.15   | -0.11 | 0.09        | -0.20 | 0.35         | <b>-0.42</b> | 0.17         | 0.19         | -0.02       | 0.18        | -0.03       | <b>0.36</b>  | 0.17         | <b>-0.36</b> | -0.17 | -0.12       | 0.24         | SWG  |
| SOG  | <0.01  | 0.62  | 0.67   | 0.68         |              | <b>0.56</b>  | 0.17   | -0.08       | 0.26   | 0.32  | 0.27        | 0.03  | -0.06        | <b>-0.63</b> | 0.18         | <b>0.42</b>  | 0.23        | -0.07       | -0.12       | <b>0.79</b>  | <b>0.44</b>  | -0.33        | -0.02 | 0.15        | 0.33         | SOG  |
| SGW  | <0.001 | 0.27  | <0.001 | <0.01        | <0.01        |              | -0.03  | -0.07       | 0.15   | 0.05  | 0.09        | 0.13  | 0.12         | <b>-0.65</b> | 0.06         | <b>0.50</b>  | 0.15        | <b>0.60</b> | 0.03        | <b>0.66</b>  | <b>0.41</b>  | <b>-0.45</b> | 0.02  | <b>0.40</b> | 0.34         | SGW  |
| SANQ | 0.81   | 0.61  | 0.71   | 0.50         | 0.37         | 0.86         |        | <b>0.70</b> | 0.09   | -0.11 | -0.01       | -0.09 | -0.08        | -0.24        | 0.03         | <b>0.54</b>  | <b>0.92</b> | -0.12       | <b>0.66</b> | 0.10         | -0.06        | -0.20        | 0.23  | -0.10       | -0.08        | SANQ |
| SQ   | 0.19   | 0.90  | 0.82   | 0.55         | 0.68         | 0.69         | <0.001 |             | 0.22   | -0.13 | 0.04        | -0.08 | -0.18        | 0.03         | -0.10        | 0.31         | <b>0.61</b> | -0.03       | <b>0.96</b> | -0.11        | -0.14        | -0.17        | 0.24  | -0.18       | -0.31        | SQ   |
| SWC  | 0.51   | 0.96  | 0.53   | 0.43         | 0.16         | 0.43         | 0.65   | 0.24        |        | -0.06 | <b>0.91</b> | -0.13 | -0.01        | -0.15        | -0.01        | 0.03         | 0.04        | -0.18       | 0.11        | <b>0.38</b>  | -0.04        | -0.10        | -0.20 | -0.16       | -0.22        | SWC  |
| SPrd | 0.73   | 0.14  | 0.33   | 0.55         | 0.08         | 0.78         | 0.57   | 0.50        | 0.74   |       | -0.03       | -0.11 | -0.13        | -0.20        | 0.08         | 0.26         | -0.14       | -0.06       | -0.15       | <b>0.07</b>  | -0.09        | 0.06         | -0.01 | -0.02       | -0.03        | SPrd |
| SP   | 0.58   | 0.50  | 0.23   | 0.64         | 0.14         | 0.63         | 0.97   | 0.84        | <0.001 | 0.86  |             | -0.11 | -0.04        | -0.20        | 0.05         | 0.04         | -0.05       | -0.25       | -0.09       | <b>0.42</b>  | -0.03        | -0.15        | -0.28 | -0.13       | -0.17        | SP   |
| SW   | 0.66   | 0.62  | 0.17   | 0.28         | 0.86         | 0.48         | 0.63   | 0.68        | 0.48   | 0.57  | 0.57        |       | 0.25         | -0.18        | 0.15         | 0.10         | -0.13       | 0.29        | -0.04       | 0.02         | 0.07         | -0.13        | 0.19  | <b>0.46</b> | 0.31         | SW   |
| SO   | 0.04   | 0.22  | 0.67   | 0.06         | 0.74         | 0.52         | 0.67   | 0.34        | 0.95   | 0.47  | 0.82        | 0.18  |              | -0.28        | 0.32         | -0.08        | -0.03       | 0.06        | -0.14       | 0.09         | -0.03        | -0.13        | 0.01  | 0.05        | <b>0.60</b>  | SO   |
| Ilec | <0.001 | 0.22  | 0.90   | 0.02         | <0.01        | <0.001       | 0.19   | 0.86        | 0.41   | 0.27  | 0.29        | 0.34  | 0.12         |              | <b>-0.47</b> | <b>-0.69</b> | -0.26       | -0.09       | 0.02        | <b>-0.83</b> | -0.27        | <b>0.58</b>  | 0.08  | -0.02       | <b>-0.49</b> | Ilec |
| IRtW | 0.23   | 0.44  | 0.16   | 0.37         | 0.32         | 0.74         | 0.88   | 0.60        | 0.97   | 0.68  | 0.77        | 0.42  | 0.08         | <0.01        |              | <b>0.39</b>  | 0.06        | -0.17       | -0.13       | <b>0.36</b>  | -0.16        | -0.19        | -0.20 | -0.11       | 0.27         | IRtW |
| IFUp | 0.35   | 0.14  | 0.20   | 0.32         | 0.02         | <0.01        | <0.01  | 0.09        | 0.85   | 0.15  | 0.82        | 0.58  | 0.69         | <0.001       | 0.03         |              | <b>0.56</b> | 0.32        | 0.31        | <b>0.47</b>  | -0.12        | <b>-0.44</b> | 0.09  | 0.12        | 0.07         | IFUp |
| IPQ  | 0.98   | 0.26  | 0.63   | 0.90         | 0.22         | 0.42         | <0.001 | <0.001      | 0.81   | 0.45  | 0.78        | 0.48  | 0.88         | 0.16         | 0.74         | <0.001       |             | 0.05        | <b>0.62</b> | 0.17         | -0.06        | -0.22        | 0.24  | -0.03       | 0.00         | IPQ  |
| ICQ  | 0.97   | 0.03  | <0.001 | 0.34         | 0.72         | <0.001       | 0.53   | 0.89        | 0.34   | 0.74  | 0.17        | 0.11  | 0.76         | 0.64         | 0.37         | 0.08         | 0.78        |             | 0.10        | -0.05        | -0.11        | -0.13        | 0.21  | <b>0.42</b> | 0.06         | ICQ  |
| IAnQ | 0.26   | 0.87  | 0.36   | 0.85         | 0.54         | 0.89         | <0.001 | <0.001      | 0.57   | 0.42  | 0.63        | 0.85  | 0.45         | 0.90         | 0.50         | 0.09         | <0.01       | 0.61        |             | -0.13        | -0.13        | -0.16        | 0.27  | -0.10       | -0.30        | IAnQ |
| IMG  | <0.001 | 0.72  | 0.62   | 0.05         | <0.001       | <0.001       | 0.59   | 0.57        | 0.03   | 0.72  | 0.02        | 0.92  | 0.62         | <0.001       | 0.05         | <0.001       | 0.35        | 0.80        | 0.50        |              | <b>0.43</b>  | <b>-0.52</b> | -0.20 | -0.04       | <b>0.38</b>  | IMG  |
| Ilo1 | <0.001 | 0.17  | 0.92   | 0.35         | 0.01         | 0.02         | 0.73   | 0.46        | 0.81   | 0.63  | 0.88        | 0.69  | 0.87         | 0.15         | 0.39         | 0.53         | 0.75        | 0.55        | 0.48        | 0.02         |              | -0.29        | 0.02  | 0.34        | <b>0.42</b>  | Ilo1 |
| IDV  | <0.01  | 0.66  | 0.74   | 0.05         | 0.07         | 0.01         | 0.29   | 0.37        | 0.58   | 0.74  | 0.41        | 0.48  | 0.48         | <0.001       | 0.31         | 0.01         | 0.23        | 0.49        | 0.40        | <0.01        | 0.11         |              | 0.09  | -0.11       | -0.25        | IDV  |
| Iadm | 0.34   | 0.21  | 0.30   | 0.36         | 0.93         | 0.91         | 0.22   | 0.20        | 0.29   | 0.96  | 0.12        | 0.29  | 0.96         | 0.65         | 0.27         | 0.63         | 0.19        | 0.26        | 0.14        | 0.29         | 0.93         | 0.63         |       | 0.22        | 0.01         | Iadm |
| IW   | 0.68   | 0.30  | <0.01  | 0.53         | 0.41         | 0.03         | 0.59   | 0.33        | 0.38   | 0.93  | 0.48        | <0.01 | 0.81         | 0.92         | 0.54         | 0.51         | 0.86        | 0.02        | 0.58        | 0.81         | 0.06         | 0.57         | 0.24  |             | 0.20         | IW   |
| IO   | <0.001 | 0.09  | 0.66   | 0.19         | 0.07         | 0.06         | 0.68   | 0.09        | 0.23   | 0.89  | 0.37        | 0.09  | <0.001       | <0.01        | 0.15         | 0.72         | 0.99        | 0.74        | 0.11        | 0.04         | 0.02         | 0.18         | 0.96  | 0.29        |              | IO   |
|      | SL     | Sind  | SCG    | SWG          | SOG          | SGW          | SANQ   | SQ          | SWC    | SPrd  | SP          | SW    | SO           | Ilec         | IRtW         | IFUp         | IPQ         | ICQ         | IAnQ        | IMG          | Ilo1         | IDV          | Iadm  | IW          | IO           |      |

Values above the diagonal are correlation coefficients; bold values are significant at the  $p < 0.05$  level. Values below the diagonal are  $p$ -

values. Red fill indicates significant negative correlations; green fill denotes significant positive correlations.
