# Supplementary material for: Small changes, big gains: A curriculum-wide study of teaching practices and student learning in undergraduate biology
Source: PubMed Central journal article supplement (PMC6713325; doi:10.1371/journal.pone.0220900), 2019-08-28

**Figure S1**

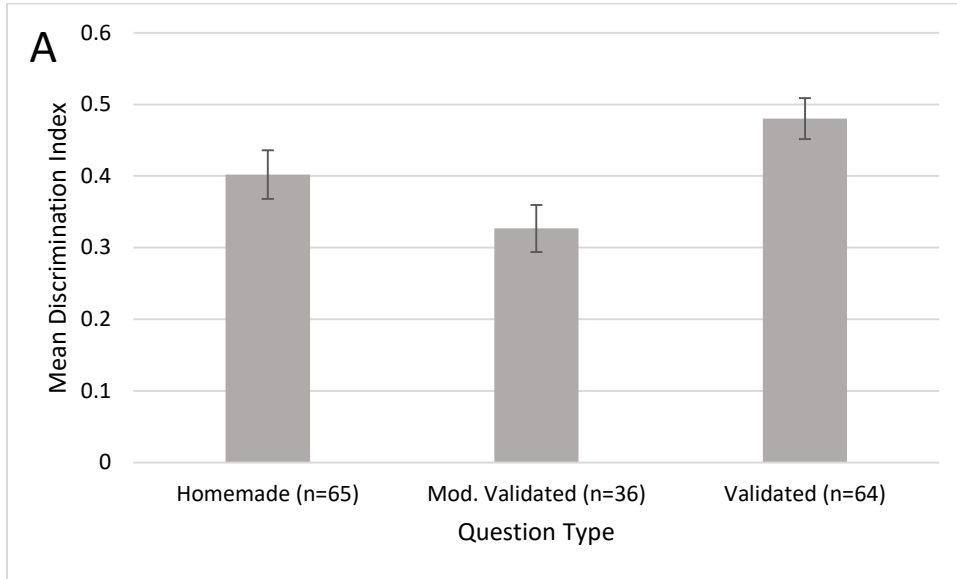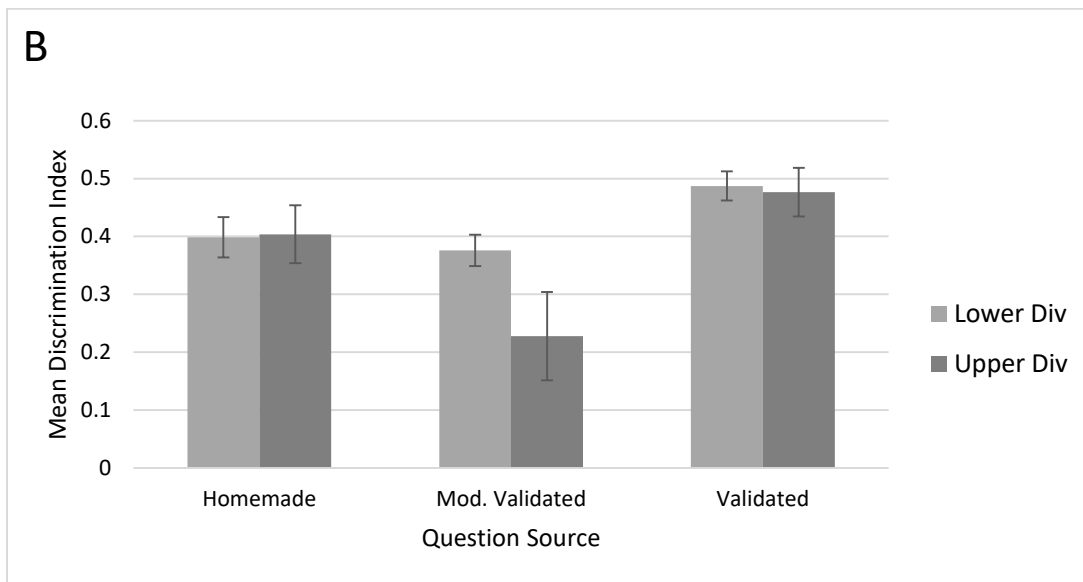

Supplement: pone.0220900.s006.pdf [file pone.0220900.s006.pdf]
