# Supplementary material for: Small changes, big gains: A curriculum-wide study of teaching practices and student learning in undergraduate biology
Source: PLoS One. 2019 Aug 28;14(8):e0220900. doi: 10.1371/journal.pone.0220900 (PMC6713325; doi:10.1371/journal.pone.0220900)
Supplement: S1 File — (XLSX) [file pone.0220900.s001.xlsx]

## Sheet: ci.scores
term	unique.section	course.level	pre.score	post.score
2013W1	1A	1	28.6	100
2013W1	1A	1	28.6	100
2013W1	1A	1	28.6	57.1
2013W1	1A	1	14.3	71.4
2013W1	1A	1	28.6	85.7
2013W1	1A	1	14.3	71.4
2013W1	1A	1	28.6	85.7
2013W1	1A	1	28.6	57.1
2013W1	1A	1	57.1	85.7
2013W1	1A	1	0	57.1
2013W1	1A	1	42.9	57.1
2013W1	1A	1	57.1	100
2013W1	1A	1	28.6	85.7
2013W1	1A	1	42.9	85.7
2013W1	1A	1	42.9	85.7
2013W1	1A	1	42.9	85.7
2013W1	1A	1	42.9	85.7
2013W1	1A	1	42.9	85.7
2013W1	1A	1	42.9	100
2013W1	1A	1	28.6	57.1
2013W1	1A	1	28.6	28.6
2013W1	1A	1	28.6	71.4
2013W1	1A	1	14.3	85.7
2013W1	1A	1	28.6	100
2013W1	1A	1	14.3	57.1
2013W1	1A	1	28.6	71.4
2013W1	1A	1	42.9	100
2013W1	1A	1	42.9	100
2013W1	1A	1	42.9	71.4
2013W1	1A	1	0	57.1
2013W1	1A	1	28.6	85.7
2013W1	1A	1	42.9	100
2013W1	1A	1	0	85.7
2013W1	1A	1	28.6	100
2013W1	1A	1	42.9	85.7
2013W1	1A	1	42.9	85.7
2013W1	1A	1	42.9	85.7
2013W1	1A	1	0	57.1
2013W1	1A	1	14.3	85.7
2013W1	1A	1	42.9	100
2013W1	1A	1	42.9	85.7
2013W1	1A	1	28.6	85.7
2013W1	1A	1	57.1	100
2013W1	1A	1	14.3	57.1
2013W1	1A	1	28.6	100
2013W1	1A	1	0	85.7
2013W1	1A	1	28.6	85.7
2013W1	1A	1	42.9	85.7
2013W1	1A	1	28.6	71.4
2013W1	1A	1	14.3	85.7
2013W1	1A	1	28.6	85.7
2013W1	1A	1	28.6	71.4
2013W1	1A	1	14.3	28.6
2013W1	1A	1	28.6	42.9
2013W1	1A	1	42.9	71.4
2013W1	1A	1	42.9	71.4
2013W1	1A	1	14.3	85.7
2013W1	1A	1	28.6	85.7
2013W1	1A	1	42.9	57.1
2013W1	1A	1	28.6	57.1
2013W1	1A	1	14.3	71.4
2013W1	1A	1	0	57.1
2013W1	1A	1	28.6	57.1
2013W1	1A	1	14.3	71.4
2013W1	1A	1	14.3	85.7
2013W1	1A	1	57.1	85.7
2013W1	1A	1	28.6	57.1
2013W1	1A	1	14.3	57.1
2013W1	1A	1	28.6	85.7
2013W1	1A	1	57.1	71.4
2013W1	1A	1	28.6	71.4
2013W1	1A	1	42.9	85.7
2013W1	1A	1	28.6	85.7
2013W1	1A	1	28.6	100
2013W1	1A	1	57.1	100
2013W1	1A	1	71.4	85.7
2013W1	1A	1	14.3	85.7
2013W1	1A	1	28.6	71.4
2013W1	1A	1	42.9	100
2013W1	1A	1	42.9	71.4
2013W1	1A	1	14.3	100
2013W1	1A	1	42.9	100
2013W1	1A	1	42.9	100
2013W1	1A	1	14.3	100
2013W1	1A	1	42.9	100
2013W1	1A	1	57.1	100
2013W1	1A	1	14.3	85.7
2013W1	1A	1	14.3	85.7
2013W1	1A	1	57.1	85.7
2013W1	1A	1	28.6	100
2013W1	1A	1	42.9	85.7
2013W1	1A	1	57.1	100
2013W1	1A	1	42.9	100
2013W1	1A	1	42.9	85.7
2013W1	1A	1	42.9	85.7
2013W1	1A	1	28.6	85.7
2013W1	1A	1	42.9	100
2013W1	1A	1	42.9	100
2013W1	1A	1	14.3	100
2013W1	1A	1	28.6	57.1
2013W1	1A	1	14.3	85.7
2013W1	1A	1	28.6	71.4
2013W1	1A	1	42.9	100
2013W1	1A	1	14.3	100
2013W1	1A	1	28.6	85.7
2013W1	1A	1	14.3	100
2013W1	1A	1	14.3	100
2013W1	1A	1	28.6	85.7
2013W1	1A	1	14.3	100
2013W1	1A	1	28.6	100
2013W1	1A	1	42.9	85.7
2013W1	1A	1	42.9	100
2013W1	1A	1	42.9	100
2013W1	1A	1	42.9	100
2013W1	1A	1	57.1	85.7
2013W1	1A	1	14.3	57.1
2013W1	1A	1	28.6	100
2013W1	1A	1	28.6	100
2013W1	1A	1	42.9	100
2013W1	1A	1	14.3	28.6
2013W1	1A	1	0	71.4
2013W1	1A	1	0	71.4
2013W1	1A	1	28.6	100
2013W1	1A	1	28.6	71.4
2013W1	1A	1	42.9	85.7
2013W1	1A	1	14.3	42.9
2013W1	1A	1	28.6	100
2013W1	1A	1	42.9	85.7
2013W1	1A	1	28.6	85.7
2013W1	1A	1	71.4	100
2013W1	1A	1	28.6	100
2013W1	1A	1	0	57.1
2013W1	1A	1	14.3	85.7
2013W1	1A	1	0	42.9
2013W1	1A	1	28.6	85.7
2013W1	1A	1	42.9	100
2013W1	1A	1	42.9	85.7
2013W1	1A	1	42.9	71.4
2013W1	1A	1	0	85.7
2013W1	1A	1	42.9	71.4
2013W1	1A	1	42.9	85.7
2013W1	1A	1	28.6	71.4
2013W1	1A	1	14.3	85.7
2013W1	1A	1	28.6	57.1
2013W1	1A	1	42.9	100
2013W1	1A	1	14.3	57.1
2013W1	1A	1	14.3	100
2013W1	1A	1	42.9	100
2013W1	1A	1	57.1	100
2013W1	1A	1	42.9	85.7
2013W1	1A	1	0	42.9
2013W1	1A	1	42.9	85.7
2013W1	1A	1	42.9	85.7
2013W1	1A	1	57.1	85.7
2013W1	1A	1	28.6	100
2013W1	1A	1	42.9	71.4
2013W1	1A	1	42.9	42.9
2013W1	1A	1	57.1	85.7
2013W1	1A	1	28.6	71.4
2013W1	1A	1	14.3	85.7
2013W1	1A	1	0	100
2013W1	1A	1	42.9	100
2013W1	1A	1	42.9	57.1
2013W1	1A	1	0	57.1
2013W1	1A	1	42.9	100
2013W1	1A	1	57.1	100
2013W1	1A	1	42.9	100
2013W1	1A	1	42.9	100
2013W1	1A	1	57.1	100
2013W1	1A	1	71.4	100
2013W1	1A	1	28.6	71.4
2013W1	1A	1	28.6	100
2013W1	1A	1	42.9	100
2013W1	1A	1	42.9	85.7
2013W1	1A	1	28.6	100
2013W1	1A	1	42.9	85.7
2013W1	1A	1	42.9	85.7
2013W1	1A	1	28.6	71.4
2013W1	1A	1	28.6	71.4
2013W1	1A	1	0	100
2013W1	1A	1	14.3	85.7
2013W1	1A	1	42.9	100
2013W1	1A	1	28.6	71.4
2013W1	1A	1	14.3	100
2013W1	1A	1	42.9	71.4
2013W1	1A	1	14.3	85.7
2013W1	1A	1	57.1	100
2013W1	1A	1	57.1	14.3
2013W1	1A	1	14.3	57.1
2013W1	1A	1	42.9	100
2013W1	1A	1	28.6	57.1
2013W1	1A	1	14.3	42.9
2013W1	1A	1	57.1	85.7
2013W1	1A	1	57.1	100
2013W1	1A	1	28.6	85.7
2013W1	1A	1	42.9	85.7
2013W1	1A	1	42.9	71.4
2013W1	1A	1	57.1	71.4
2013W1	1A	1	71.4	71.4
2013W1	1B	1	14.3	57.1
2013W1	1B	1	71.4	85.7
2013W1	1B	1	14.3	71.4
2013W1	1B	1	57.1	71.4
2013W1	1B	1	71.4	100
2013W1	1B	1	42.9	85.7
2013W1	1B	1	71.4	100
2013W1	1B	1	42.9	57.1
2013W1	1B	1	28.6	100
2013W1	1B	1	85.7	71.4
2013W1	1B	1	14.3	57.1
2013W1	1B	1	28.6	85.7
2013W1	1B	1	42.9	57.1
2013W1	1B	1	28.6	57.1
2013W1	1B	1	28.6	71.4
2013W1	1B	1	85.7	85.7
2013W1	1B	1	14.3	85.7
2013W1	1B	1	42.9	100
2013W1	1B	1	57.1	85.7
2013W1	1B	1	28.6	71.4
2013W1	1B	1	0	100
2013W1	1B	1	42.9	85.7
2013W1	1B	1	42.9	100
2013W1	1B	1	0	42.9
2013W1	1B	1	57.1	71.4
2013W1	1B	1	28.6	85.7
2013W1	1B	1	57.1	100
2013W1	1B	1	14.3	57.1
2013W1	1B	1	57.1	85.7
2013W1	1B	1	28.6	85.7
2013W1	1B	1	28.6	71.4
2013W1	1B	1	57.1	85.7
2013W1	1B	1	42.9	42.9
2013W1	1B	1	71.4	57.1
2013W1	1B	1	14.3	42.9
2013W1	1B	1	28.6	57.1
2013W1	1B	1	28.6	57.1
2013W1	1B	1	57.1	57.1
2013W1	1B	1	42.9	57.1
2013W1	1B	1	14.3	71.4
2013W1	1B	1	85.7	85.7
2013W1	1B	1	42.9	42.9
2013W1	1B	1	42.9	100
2013W1	1B	1	71.4	71.4
2013W1	1B	1	14.3	71.4
2013W1	1B	1	28.6	85.7
2013W1	1B	1	42.9	71.4
2013W1	1B	1	71.4	85.7
2013W1	1B	1	14.3	100
2013W1	1B	1	57.1	100
2013W1	1B	1	42.9	85.7
2013W1	1B	1	14.3	42.9
2013W1	1B	1	28.6	85.7
2013W1	1B	1	42.9	57.1
2013W1	1B	1	85.7	85.7
2013W1	1B	1	71.4	57.1
2013W1	1B	1	14.3	85.7
2013W1	1B	1	57.1	100
2013W1	1B	1	28.6	42.9
2013W1	1B	1	85.7	85.7
2013W1	1B	1	71.4	100
2013W1	1B	1	42.9	100
2013W1	1B	1	42.9	71.4
2013W1	1B	1	28.6	85.7
2013W1	1B	1	42.9	85.7
2013W1	1B	1	71.4	28.6
2013W1	1B	1	28.6	57.1
2013W1	1B	1	57.1	71.4
2013W1	1B	1	71.4	85.7
2013W1	1B	1	71.4	100
2013W1	1B	1	71.4	100
2013W1	1B	1	85.7	71.4
2013W1	1B	1	57.1	85.7
2013W1	1B	1	14.3	85.7
2013W1	1B	1	28.6	85.7
2013W1	1B	1	57.1	100
2013W1	1B	1	42.9	57.1
2013W1	1B	1	42.9	57.1
2013W1	1B	1	57.1	85.7
2013W1	1B	1	71.4	100
2013W1	1B	1	14.3	85.7
2013W1	1B	1	85.7	85.7
2013W1	1B	1	28.6	57.1
2013W1	1B	1	28.6	85.7
2013W1	1B	1	28.6	85.7
2013W1	1B	1	28.6	100
2013W1	1B	1	100	100
2013W1	1B	1	85.7	71.4
2013W1	1B	1	14.3	100
2013W1	1B	1	71.4	85.7
2013W1	1B	1	71.4	100
2013W1	1B	1	71.4	85.7
2013W1	1B	1	0	57.1
2013W1	1B	1	85.7	100
2013W1	1B	1	14.3	100
2013W1	1B	1	85.7	100
2013W1	1B	1	71.4	85.7
2013W1	1B	1	28.6	100
2013W1	1B	1	71.4	71.4
2013W1	1B	1	71.4	85.7
2013W1	1B	1	28.6	85.7
2013W1	1B	1	71.4	71.4
2013W1	1B	1	28.6	100
2013W1	1B	1	71.4	100
2013W1	1B	1	57.1	71.4
2013W1	1B	1	71.4	85.7
2013W1	1B	1	0	71.4
2013W1	1C	1	0	85.7
2013W1	1C	1	42.9	85.7
2013W1	1C	1	14.3	71.4
2013W1	1C	1	42.9	85.7
2013W1	1C	1	28.6	100
2013W1	1C	1	0	100
2013W1	1C	1	28.6	71.4
2013W1	1C	1	0	14.3
2013W1	1C	1	14.3	0
2013W1	1C	1	28.6	85.7
2013W1	1C	1	42.9	100
2013W1	1C	1	28.6	85.7
2013W1	1C	1	0	57.1
2013W1	1C	1	0	85.7
2013W1	1C	1	28.6	85.7
2013W1	1C	1	28.6	85.7
2013W1	1C	1	28.6	100
2013W1	1C	1	28.6	100
2013W1	1C	1	57.1	85.7
2013W1	1C	1	28.6	71.4
2013W1	1C	1	28.6	100
2013W1	1C	1	28.6	85.7
2013W1	1C	1	42.9	71.4
2013W1	1C	1	14.3	71.4
2013W1	1C	1	28.6	71.4
2013W1	1C	1	42.9	42.9
2013W1	1C	1	28.6	100
2013W1	1C	1	42.9	100
2013W1	1C	1	28.6	71.4
2013W1	1C	1	0	100
2013W1	1C	1	42.9	100
2013W1	1C	1	28.6	100
2013W1	1C	1	42.9	100
2013W1	1C	1	0	42.9
2013W1	1C	1	28.6	85.7
2013W1	1C	1	71.4	71.4
2013W1	1C	1	42.9	100
2013W1	1C	1	14.3	100
2013W1	1C	1	42.9	100
2013W1	1C	1	28.6	100
2013W1	1C	1	28.6	42.9
2013W1	1C	1	42.9	71.4
2013W1	1C	1	14.3	85.7
2013W1	1C	1	42.9	100
2013W1	1C	1	14.3	42.9
2013W1	1C	1	71.4	100
2013W1	1C	1	14.3	42.9
2013W1	1C	1	42.9	85.7
2013W1	1C	1	14.3	57.1
2013W1	1C	1	14.3	71.4
2013W1	1C	1	42.9	100
2013W1	1C	1	57.1	100
2013W1	1C	1	28.6	100
2013W1	1C	1	71.4	71.4
2013W1	1C	1	0	71.4
2013W1	1C	1	28.6	71.4
2013W1	1C	1	28.6	42.9
2013W1	1C	1	28.6	100
2013W1	1C	1	28.6	85.7
2013W1	1C	1	28.6	57.1
2013W1	1C	1	14.3	85.7
2013W1	1C	1	14.3	85.7
2013W1	1C	1	14.3	85.7
2013W1	1C	1	42.9	85.7
2013W1	1C	1	42.9	100
2013W1	1C	1	28.6	85.7
2013W1	1C	1	28.6	85.7
2013W1	1C	1	28.6	100
2013W1	1C	1	57.1	71.4
2013W1	1C	1	28.6	100
2013W1	1C	1	28.6	57.1
2013W1	1C	1	42.9	71.4
2013W1	1C	1	42.9	100
2013W1	1C	1	28.6	85.7
2013W1	1C	1	28.6	57.1
2013W1	1C	1	28.6	71.4
2013W1	1C	1	57.1	71.4
2013W1	1C	1	14.3	85.7
2013W1	1C	1	14.3	100
2013W1	1C	1	14.3	85.7
2013W1	1C	1	28.6	85.7
2013W1	1C	1	28.6	85.7
2013W1	1C	1	42.9	85.7
2013W1	1C	1	14.3	85.7
2013W1	1C	1	0	71.4
2013W1	1C	1	57.1	85.7
2013W1	1C	1	42.9	57.1
2013W1	1C	1	42.9	71.4
2013W1	1C	1	28.6	71.4
2013W1	1C	1	42.9	85.7
2013W1	1C	1	42.9	100
2013W1	1C	1	57.1	85.7
2013W1	1C	1	14.3	28.6
2013W1	1C	1	57.1	100
2013W1	1C	1	42.9	100
2013W1	1C	1	28.6	85.7
2013W1	1C	1	14.3	85.7
2013W1	1C	1	28.6	71.4
2013W1	1C	1	28.6	100
2013W1	1C	1	57.1	57.1
2013W1	1C	1	28.6	85.7
2013W1	1C	1	28.6	100
2013W1	1C	1	28.6	85.7
2013W1	1C	1	14.3	71.4
2013W1	1C	1	14.3	71.4
2013W1	1C	1	28.6	100
2013W1	1C	1	28.6	100
2013W1	1C	1	14.3	100
2013W1	1C	1	0	85.7
2013W1	1C	1	14.3	71.4
2013W1	1C	1	57.1	0
2013W1	1C	1	42.9	100
2013W1	1C	1	42.9	71.4
2013W1	1C	1	14.3	85.7
2013W1	1C	1	14.3	14.3
2013W1	1C	1	28.6	100
2013W1	1C	1	28.6	85.7
2013W1	1C	1	42.9	100
2013W1	1C	1	28.6	71.4
2013W1	1C	1	28.6	57.1
2013W1	1C	1	0	85.7
2013W1	1C	1	14.3	71.4
2013W1	1C	1	57.1	85.7
2013W1	1C	1	42.9	100
2013W1	1C	1	42.9	85.7
2013W1	1C	1	28.6	85.7
2013W1	1C	1	28.6	100
2013W1	1C	1	28.6	100
2013W1	1C	1	42.9	85.7
2013W1	1C	1	42.9	100
2013W1	1C	1	28.6	57.1
2013W1	1C	1	28.6	71.4
2013W1	1C	1	57.1	85.7
2013W1	1C	1	57.1	85.7
2013W1	1C	1	14.3	28.6
2013W1	1C	1	28.6	71.4
2013W1	1C	1	28.6	85.7
2013W1	1C	1	14.3	85.7
2013W1	1C	1	28.6	100
2013W1	1C	1	28.6	57.1
2013W1	1C	1	42.9	71.4
2013W1	1C	1	42.9	71.4
2013W1	1C	1	14.3	57.1
2013W1	1C	1	28.6	100
2013W1	1C	1	0	42.9
2013W1	1C	1	14.3	85.7
2013W1	1C	1	28.6	42.9
2013W1	1C	1	28.6	100
2013W1	1C	1	14.3	42.9
2013W1	1C	1	14.3	100
2013W1	1C	1	71.4	57.1
2013W1	1C	1	28.6	71.4
2013W1	1C	1	42.9	85.7
2013W1	1C	1	14.3	85.7
2013W1	1C	1	57.1	100
2013W1	1C	1	28.6	71.4
2013W1	1C	1	28.6	85.7
2013W1	1C	1	42.9	85.7
2013W1	1C	1	14.3	85.7
2013W1	1C	1	42.9	85.7
2013W1	1C	1	42.9	57.1
2013W1	1C	1	42.9	100
2013W1	1C	1	57.1	100
2013W1	1C	1	28.6	42.9
2013W1	1C	1	42.9	100
2013W1	1C	1	42.9	71.4
2013W1	1C	1	57.1	85.7
2013W1	1C	1	0	57.1
2013W1	1C	1	28.6	85.7
2013W1	1C	1	14.3	85.7
2013W1	1C	1	42.9	100
2013W1	1C	1	57.1	85.7
2013W1	1C	1	28.6	71.4
2013W1	1C	1	42.9	100
2013W1	1C	1	14.3	100
2013W1	1C	1	42.9	100
2013W1	1C	1	14.3	85.7
2013W1	1C	1	42.9	85.7
2013W1	1C	1	57.1	42.9
2013W1	1C	1	14.3	85.7
2013W1	1C	1	0	42.9
2013W1	1C	1	28.6	85.7
2013W1	1C	1	28.6	100
2013W1	1C	1	28.6	57.1
2013W1	1C	1	42.9	85.7
2013W1	1C	1	71.4	100
2013W1	1C	1	42.9	85.7
2013W1	1C	1	14.3	71.4
2013W1	1C	1	42.9	85.7
2013W1	1C	1	28.6	85.7
2013W1	1C	1	28.6	85.7
2013W1	1C	1	28.6	100
2013W1	1C	1	42.9	85.7
2013W1	1C	1	42.9	71.4
2013W1	1C	1	42.9	100
2013W1	1C	1	57.1	100
2013W1	1C	1	28.6	71.4
2013W1	1C	1	0	28.6
2013W1	1C	1	14.3	42.9
2013W1	1C	1	0	85.7
2013W1	1C	1	14.3	100
2013W1	1C	1	14.3	85.7
2013W1	1C	1	42.9	100
2013W1	1C	1	14.3	71.4
2013W1	1C	1	42.9	100
2013W1	1C	1	42.9	71.4
2013W1	1C	1	57.1	100
2013W1	1C	1	42.9	100
2013W1	1C	1	57.1	71.4
2013W1	1C	1	0	85.7
2013W1	1C	1	42.9	100
2013W1	1C	1	0	28.6
2013W1	1C	1	42.9	85.7
2013W1	1C	1	28.6	71.4
2013W1	1C	1	28.6	85.7
2013W1	1D	1	42.9	85.7
2013W1	1D	1	14.3	85.7
2013W1	1D	1	14.3	85.7
2013W1	1D	1	57.1	71.4
2013W1	1D	1	14.3	100
2013W1	1D	1	28.6	100
2013W1	1D	1	57.1	85.7
2013W1	1D	1	14.3	85.7
2013W1	1D	1	71.4	100
2013W1	1D	1	28.6	100
2013W1	1D	1	28.6	100
2013W1	1D	1	14.3	71.4
2013W1	1D	1	14.3	71.4
2013W1	1D	1	14.3	100
2013W1	1D	1	0	71.4
2013W1	1D	1	14.3	85.7
2013W1	1D	1	0	71.4
2013W1	1D	1	57.1	85.7
2013W1	1D	1	28.6	57.1
2013W1	1D	1	42.9	71.4
2013W1	1D	1	42.9	100
2013W1	1D	1	42.9	100
2013W1	1D	1	42.9	85.7
2013W1	1D	1	57.1	85.7
2013W1	1D	1	14.3	71.4
2013W1	1D	1	14.3	85.7
2013W1	1D	1	14.3	57.1
2013W1	1D	1	28.6	71.4
2013W1	1D	1	14.3	85.7
2013W1	1D	1	28.6	100
2013W1	1D	1	14.3	85.7
2013W1	1D	1	57.1	100
2013W1	1D	1	0	85.7
2013W1	1D	1	14.3	85.7
2013W1	1D	1	28.6	100
2013W1	1D	1	28.6	71.4
2013W1	1D	1	14.3	85.7
2013W1	1D	1	0	71.4
2013W1	1D	1	28.6	42.9
2013W1	1D	1	28.6	100
2013W1	1D	1	28.6	100
2013W1	1D	1	57.1	57.1
2013W1	1D	1	0	28.6
2013W1	1D	1	57.1	100
2013W1	1D	1	14.3	85.7
2013W1	1D	1	71.4	85.7
2013W1	1D	1	57.1	100
2013W1	1D	1	28.6	85.7
2013W1	1D	1	14.3	57.1
2013W1	1D	1	42.9	85.7
2013W1	1D	1	28.6	85.7
2013W1	1D	1	42.9	71.4
2013W1	1D	1	28.6	85.7
2013W1	1D	1	14.3	57.1
2013W1	1D	1	0	42.9
2013W1	1D	1	14.3	71.4
2013W1	1D	1	14.3	100
2013W1	1D	1	0	14.3
2013W1	1D	1	42.9	100
2013W1	1D	1	42.9	42.9
2013W1	1D	1	57.1	71.4
2013W1	1D	1	28.6	85.7
2013W1	1D	1	42.9	100
2013W1	1D	1	14.3	85.7
2013W1	1D	1	28.6	100
2013W1	1D	1	14.3	85.7
2013W1	1D	1	0	71.4
2013W1	1D	1	42.9	100
2013W1	1D	1	57.1	100
2013W1	1D	1	28.6	100
2013W1	1D	1	42.9	71.4
2013W1	1D	1	28.6	71.4
2013W1	1D	1	14.3	85.7
2013W1	1D	1	42.9	85.7
2013W1	1D	1	14.3	85.7
2013W1	1D	1	14.3	100
2013W1	1D	1	57.1	100
2013W1	1D	1	28.6	71.4
2013W1	1D	1	0	85.7
2013W1	1D	1	14.3	57.1
2013W1	1D	1	42.9	85.7
2013W1	1D	1	42.9	100
2013W1	1D	1	42.9	85.7
2013W1	1D	1	57.1	85.7
2013W1	1D	1	14.3	71.4
2013W1	1D	1	42.9	100
2013W1	1D	1	42.9	71.4
2013W1	1D	1	28.6	71.4
2013W1	1D	1	28.6	71.4
2013W1	1D	1	42.9	85.7
2013W1	1D	1	28.6	85.7
2013W1	1D	1	14.3	85.7
2013W1	1D	1	42.9	100
2013W1	1D	1	14.3	71.4
2013W1	1D	1	14.3	85.7
2013W1	1D	1	14.3	85.7
2013W1	1D	1	42.9	85.7
2013W1	1D	1	42.9	71.4
2013W1	1D	1	28.6	28.6
2013W1	1D	1	0	85.7
2013W1	1D	1	28.6	71.4
2013W1	1D	1	42.9	42.9
2013W1	1D	1	42.9	71.4
2013W1	1D	1	28.6	100
2013W1	1D	1	42.9	100
2013W1	1D	1	28.6	100
2013W1	1D	1	71.4	71.4
2013W1	1D	1	42.9	100
2013W1	1D	1	28.6	100
2013W1	1D	1	0	71.4
2013W1	1D	1	28.6	85.7
2013W1	1D	1	0	28.6
2013W1	1D	1	14.3	100
2013W1	1D	1	42.9	85.7
2013W1	1D	1	0	14.3
2013W1	1D	1	0	85.7
2013W1	1D	1	28.6	85.7
2013W1	1D	1	42.9	85.7
2013W1	1D	1	0	85.7
2013W1	1D	1	14.3	85.7
2013W1	1D	1	42.9	85.7
2013W1	1D	1	57.1	71.4
2013W1	1D	1	14.3	71.4
2013W1	1D	1	0	71.4
2013W1	1D	1	14.3	42.9
2013W1	1D	1	42.9	57.1
2013W1	1D	1	28.6	71.4
2013W1	1D	1	0	71.4
2013W1	1D	1	28.6	85.7
2013W1	1D	1	0	57.1
2013W1	1D	1	14.3	71.4
2013W1	1D	1	42.9	71.4
2013W1	1D	1	28.6	57.1
2013W1	1D	1	57.1	100
2013W1	1D	1	28.6	85.7
2013W1	1D	1	14.3	85.7
2013W1	1D	1	14.3	71.4
2013W1	1D	1	42.9	57.1
2013W1	1D	1	14.3	100
2013W1	1D	1	0	57.1
2013W1	1D	1	42.9	100
2013W1	1D	1	42.9	71.4
2013W1	1D	1	42.9	85.7
2013W1	1D	1	28.6	85.7
2013W1	1D	1	28.6	57.1
2013W1	1D	1	28.6	100
2013W1	1D	1	28.6	85.7
2013W1	1D	1	42.9	85.7
2013W1	1D	1	42.9	100
2013W1	1D	1	42.9	71.4
2013W1	1D	1	14.3	85.7
2013W1	1D	1	57.1	85.7
2013W1	1D	1	28.6	71.4
2013W1	1D	1	28.6	100
2013W1	1D	1	57.1	85.7
2013W1	1D	1	42.9	100
2013W1	1D	1	28.6	57.1
2013W1	1D	1	42.9	57.1
2013W1	1D	1	28.6	100
2013W1	1D	1	14.3	100
2013W1	1D	1	42.9	57.1
2013W1	1D	1	14.3	71.4
2013W1	1D	1	14.3	57.1
2013W1	1D	1	28.6	100
2013W1	1D	1	42.9	42.9
2013W1	1D	1	14.3	71.4
2013W1	1D	1	57.1	85.7
2013W1	1D	1	57.1	85.7
2013W1	1D	1	28.6	85.7
2013W1	1D	1	14.3	71.4
2013W1	1D	1	28.6	100
2013W1	1D	1	28.6	42.9
2013W1	1D	1	28.6	85.7
2013W1	1D	1	71.4	85.7
2013W1	1D	1	0	85.7
2013W1	1D	1	28.6	71.4
2013W1	1D	1	28.6	85.7
2013W1	1D	1	28.6	71.4
2013W1	1D	1	14.3	85.7
2013W1	1D	1	14.3	57.1
2013W1	1D	1	14.3	57.1
2013W1	1D	1	28.6	71.4
2013W1	1D	1	42.9	71.4
2013W1	1D	1	42.9	85.7
2013W1	1D	1	42.9	71.4
2013W1	1D	1	57.1	85.7
2013W1	1D	1	14.3	14.3
2013W1	1D	1	28.6	57.1
2013W1	1D	1	28.6	100
2013W1	1D	1	0	28.6
2013W1	1D	1	57.1	57.1
2013W1	1D	1	14.3	85.7
2013W1	1D	1	14.3	57.1
2013W1	1D	1	0	85.7
2013W1	1D	1	42.9	71.4
2013W1	1D	1	28.6	85.7
2013W1	1D	1	28.6	85.7
2014W2	2A	1	39.1304	47.8261
2014W2	2A	1	43.4783	65.2174
2014W2	2A	1	52.1739	47.8261
2014W2	2A	1	43.4783	34.7826
2014W2	2A	1	43.4783	60.8696
2014W2	2A	1	56.5217	78.2609
2014W2	2A	1	30.4348	65.2174
2014W2	2A	1	47.8261	52.1739
2014W2	2A	1	30.4348	47.8261
2014W2	2A	1	39.1304	52.1739
2014W2	2A	1	30.4348	56.5217
2014W2	2A	1	56.5217	60.8696
2014W2	2A	1	52.1739	78.2609
2014W2	2A	1	34.7826	52.1739
2014W2	2A	1	69.5652	52.1739
2014W2	2A	1	30.4348	73.913
2014W2	2A	1	52.1739	73.913
2014W2	2A	1	65.2174	65.2174
2014W2	2A	1	34.7826	91.3043
2014W2	2A	1	65.2174	60.8696
2014W2	2A	1	26.087	56.5217
2014W2	2A	1	34.7826	65.2174
2014W2	2A	1	21.7391	82.6087
2014W2	2A	1	60.8696	65.2174
2014W2	2A	1	39.1304	56.5217
2014W2	2A	1	52.1739	56.5217
2014W2	2A	1	56.5217	60.8696
2014W2	2A	1	52.1739	56.5217
2014W2	2A	1	43.4783	56.5217
2014W2	2A	1	34.7826	56.5217
2014W2	2A	1	26.087	73.913
2014W2	2A	1	43.4783	73.913
2014W2	2A	1	47.8261	73.913
2014W2	2A	1	39.1304	69.5652
2014W2	2A	1	47.8261	86.9565
2014W2	2A	1	65.2174	52.1739
2014W2	2A	1	52.1739	69.5652
2014W2	2A	1	60.8696	69.5652
2014W2	2A	1	43.4783	52.1739
2014W2	2A	1	78.2609	65.2174
2014W2	2A	1	30.4348	30.4348
2014W2	2A	1	39.1304	69.5652
2014W2	2A	1	43.4783	65.2174
2014W2	2A	1	52.1739	65.2174
2014W2	2A	1	52.1739	65.2174
2014W2	2A	1	65.2174	91.3043
2014W2	2A	1	60.8696	82.6087
2014W2	2A	1	52.1739	47.8261
2014W2	2A	1	65.2174	73.913
2014W2	2A	1	43.4783	73.913
2014W2	2A	1	43.4783	65.2174
2014W2	2A	1	43.4783	69.5652
2014W2	2A	1	47.8261	43.4783
2014W2	2A	1	39.1304	65.2174
2014W2	2A	1	52.1739	43.4783
2014W2	2A	1	39.1304	65.2174
2014W2	2A	1	56.5217	65.2174
2014W2	2A	1	43.4783	78.2609
2014W2	2A	1	34.7826	43.4783
2014W2	2A	1	39.1304	69.5652
2014W2	2A	1	39.1304	69.5652
2014W2	2A	1	43.4783	69.5652
2014W2	2A	1	43.4783	56.5217
2014W2	2A	1	60.8696	52.1739
2014W2	2B	1	17.3913	43.4783
2014W2	2B	1	17.3913	52.1739
2014W2	2B	1	26.087	26.087
2014W2	2B	1	26.087	52.1739
2014W2	2B	1	30.4348	34.7826
2014W2	2B	1	30.4348	52.1739
2014W2	2B	1	30.4348	86.9565
2014W2	2B	1	34.7826	56.5217
2014W2	2B	1	34.7826	73.913
2014W2	2B	1	39.1304	30.4348
2014W2	2B	1	39.1304	39.1304
2014W2	2B	1	39.1304	47.8261
2014W2	2B	1	39.1304	52.1739
2014W2	2B	1	39.1304	65.2174
2014W2	2B	1	43.4783	34.7826
2014W2	2B	1	43.4783	39.1304
2014W2	2B	1	43.4783	39.1304
2014W2	2B	1	43.4783	47.8261
2014W2	2B	1	43.4783	47.8261
2014W2	2B	1	43.4783	52.1739
2014W2	2B	1	43.4783	56.5217
2014W2	2B	1	43.4783	56.5217
2014W2	2B	1	43.4783	60.8696
2014W2	2B	1	43.4783	60.8696
2014W2	2B	1	43.4783	65.2174
2014W2	2B	1	43.4783	65.2174
2014W2	2B	1	43.4783	65.2174
2014W2	2B	1	43.4783	65.2174
2014W2	2B	1	43.4783	69.5652
2014W2	2B	1	43.4783	73.913
2014W2	2B	1	43.4783	73.913
2014W2	2B	1	43.4783	73.913
2014W2	2B	1	43.4783	82.6087
2014W2	2B	1	47.8261	47.8261
2014W2	2B	1	47.8261	56.5217
2014W2	2B	1	47.8261	56.5217
2014W2	2B	1	47.8261	60.8696
2014W2	2B	1	47.8261	60.8696
2014W2	2B	1	47.8261	73.913
2014W2	2B	1	47.8261	82.6087
2014W2	2B	1	52.1739	47.8261
2014W2	2B	1	52.1739	52.1739
2014W2	2B	1	52.1739	52.1739
2014W2	2B	1	52.1739	56.5217
2014W2	2B	1	52.1739	56.5217
2014W2	2B	1	52.1739	56.5217
2014W2	2B	1	52.1739	60.8696
2014W2	2B	1	52.1739	60.8696
2014W2	2B	1	52.1739	65.2174
2014W2	2B	1	52.1739	65.2174
2014W2	2B	1	56.5217	39.1304
2014W2	2B	1	56.5217	43.4783
2014W2	2B	1	56.5217	60.8696
2014W2	2B	1	56.5217	73.913
2014W2	2B	1	56.5217	82.6087
2014W2	2B	1	56.5217	82.6087
2014W2	2B	1	60.8696	60.8696
2014W2	2B	1	65.2174	43.4783
2014W2	2B	1	65.2174	69.5652
2014W2	2B	1	65.2174	73.913
2014W1	2C	1	26.087	34.7826
2014W1	2C	1	13.0435	56.5217
2014W1	2C	1	17.3913	52.1739
2014W1	2C	1	17.3913	65.2174
2014W1	2C	1	21.7391	52.1739
2014W1	2C	1	21.7391	73.913
2014W1	2C	1	26.087	47.8261
2014W1	2C	1	26.087	52.1739
2014W1	2C	1	26.087	65.2174
2014W1	2C	1	26.087	60.8696
2014W1	2C	1	26.087	30.4348
2014W1	2C	1	30.4348	60.8696
2014W1	2C	1	30.4348	52.1739
2014W1	2C	1	30.4348	47.8261
2014W1	2C	1	30.4348	60.8696
2014W1	2C	1	30.4348	65.2174
2014W1	2C	1	30.4348	56.5217
2014W1	2C	1	30.4348	39.1304
2014W1	2C	1	30.4348	78.2609
2014W1	2C	1	34.7826	56.5217
2014W1	2C	1	34.7826	69.5652
2014W1	2C	1	34.7826	52.1739
2014W1	2C	1	34.7826	69.5652
2014W1	2C	1	34.7826	47.8261
2014W1	2C	1	34.7826	60.8696
2014W1	2C	1	34.7826	69.5652
2014W1	2C	1	34.7826	47.8261
2014W1	2C	1	34.7826	82.6087
2014W1	2C	1	34.7826	56.5217
2014W1	2C	1	34.7826	52.1739
2014W1	2C	1	34.7826	52.1739
2014W1	2C	1	34.7826	65.2174
2014W1	2C	1	34.7826	39.1304
2014W1	2C	1	34.7826	65.2174
2014W1	2C	1	34.7826	43.4783
2014W1	2C	1	34.7826	43.4783
2014W1	2C	1	34.7826	65.2174
2014W1	2C	1	39.1304	69.5652
2014W1	2C	1	39.1304	39.1304
2014W1	2C	1	39.1304	73.913
2014W1	2C	1	39.1304	26.087
2014W1	2C	1	39.1304	65.2174
2014W1	2C	1	39.1304	78.2609
2014W1	2C	1	39.1304	47.8261
2014W1	2C	1	39.1304	69.5652
2014W1	2C	1	39.1304	52.1739
2014W1	2C	1	39.1304	52.1739
2014W1	2C	1	39.1304	47.8261
2014W1	2C	1	39.1304	65.2174
2014W1	2C	1	39.1304	60.8696
2014W1	2C	1	39.1304	56.5217
2014W1	2C	1	39.1304	39.1304
2014W1	2C	1	39.1304	69.5652
2014W1	2C	1	39.1304	52.1739
2014W1	2C	1	39.1304	73.913
2014W1	2C	1	39.1304	78.2609
2014W1	2C	1	39.1304	69.5652
2014W1	2C	1	39.1304	78.2609
2014W1	2C	1	43.4783	69.5652
2014W1	2C	1	43.4783	52.1739
2014W1	2C	1	43.4783	56.5217
2014W1	2C	1	43.4783	78.2609
2014W1	2C	1	43.4783	73.913
2014W1	2C	1	43.4783	60.8696
2014W1	2C	1	43.4783	73.913
2014W1	2C	1	43.4783	39.1304
2014W1	2C	1	43.4783	69.5652
2014W1	2C	1	43.4783	82.6087
2014W1	2C	1	43.4783	73.913
2014W1	2C	1	43.4783	60.8696
2014W1	2C	1	43.4783	60.8696
2014W1	2C	1	43.4783	52.1739
2014W1	2C	1	43.4783	65.2174
2014W1	2C	1	43.4783	43.4783
2014W1	2C	1	43.4783	69.5652
2014W1	2C	1	43.4783	73.913
2014W1	2C	1	43.4783	60.8696
2014W1	2C	1	43.4783	69.5652
2014W1	2C	1	43.4783	60.8696
2014W1	2C	1	43.4783	73.913
2014W1	2C	1	47.8261	69.5652
2014W1	2C	1	47.8261	86.9565
2014W1	2C	1	47.8261	82.6087
2014W1	2C	1	47.8261	60.8696
2014W1	2C	1	47.8261	39.1304
2014W1	2C	1	47.8261	60.8696
2014W1	2C	1	47.8261	60.8696
2014W1	2C	1	47.8261	56.5217
2014W1	2C	1	47.8261	52.1739
2014W1	2C	1	47.8261	39.1304
2014W1	2C	1	47.8261	56.5217
2014W1	2C	1	47.8261	52.1739
2014W1	2C	1	47.8261	73.913
2014W1	2C	1	47.8261	52.1739
2014W1	2C	1	52.1739	65.2174
2014W1	2C	1	52.1739	78.2609
2014W1	2C	1	52.1739	69.5652
2014W1	2C	1	52.1739	65.2174
2014W1	2C	1	52.1739	82.6087
2014W1	2C	1	52.1739	56.5217
2014W1	2C	1	52.1739	60.8696
2014W1	2C	1	52.1739	60.8696
2014W1	2C	1	52.1739	78.2609
2014W1	2C	1	52.1739	56.5217
2014W1	2C	1	52.1739	69.5652
2014W1	2C	1	52.1739	60.8696
2014W1	2C	1	52.1739	56.5217
2014W1	2C	1	52.1739	69.5652
2014W1	2C	1	52.1739	56.5217
2014W1	2C	1	56.5217	26.087
2014W1	2C	1	56.5217	69.5652
2014W1	2C	1	56.5217	73.913
2014W1	2C	1	56.5217	73.913
2014W1	2C	1	56.5217	82.6087
2014W1	2C	1	56.5217	56.5217
2014W1	2C	1	56.5217	95.6522
2014W1	2C	1	56.5217	78.2609
2014W1	2C	1	56.5217	69.5652
2014W1	2C	1	56.5217	73.913
2014W1	2C	1	56.5217	69.5652
2014W1	2C	1	56.5217	47.8261
2014W1	2C	1	60.8696	43.4783
2014W1	2C	1	60.8696	65.2174
2014W1	2C	1	60.8696	47.8261
2014W1	2C	1	60.8696	60.8696
2014W1	2C	1	60.8696	52.1739
2014W1	2C	1	60.8696	56.5217
2014W1	2C	1	60.8696	91.3043
2014W1	2C	1	60.8696	82.6087
2014W1	2C	1	65.2174	65.2174
2014W1	2C	1	65.2174	78.2609
2014W1	2C	1	65.2174	65.2174
2014W1	2C	1	69.5652	82.6087
2014W1	2C	1	73.913	86.9565
2014W1	2C	1	73.913	69.5652
2014W1	2C	1	73.913	65.2174
2014W1	2D	1	30.4348	86.9565
2014W1	2D	1	26.087	21.7391
2014W1	2D	1	43.4783	21.7391
2014W1	2D	1	43.4783	30.4348
2014W1	2D	1	47.8261	30.4348
2014W1	2D	1	47.8261	34.7826
2014W1	2D	1	39.1304	39.1304
2014W1	2D	1	47.8261	43.4783
2014W1	2D	1	39.1304	43.4783
2014W1	2D	1	30.4348	47.8261
2014W1	2D	1	43.4783	47.8261
2014W1	2D	1	56.5217	52.1739
2014W1	2D	1	30.4348	52.1739
2014W1	2D	1	39.1304	52.1739
2014W1	2D	1	47.8261	52.1739
2014W1	2D	1	56.5217	52.1739
2014W1	2D	1	8.69565	52.1739
2014W1	2D	1	47.8261	56.5217
2014W1	2D	1	26.087	56.5217
2014W1	2D	1	47.8261	60.8696
2014W1	2D	1	60.8696	60.8696
2014W1	2D	1	26.087	60.8696
2014W1	2D	1	30.4348	60.8696
2014W1	2D	1	56.5217	65.2174
2014W1	2D	1	52.1739	65.2174
2014W1	2D	1	39.1304	69.5652
2014W1	2D	1	43.4783	69.5652
2014W1	2D	1	47.8261	69.5652
2014W1	2D	1	69.5652	69.5652
2014W1	2D	1	56.5217	69.5652
2014W1	2D	1	43.4783	69.5652
2014W1	2D	1	39.1304	69.5652
2014W1	2D	1	52.1739	69.5652
2014W1	2D	1	30.4348	69.5652
2014W1	2D	1	26.087	69.5652
2014W1	2D	1	78.2609	73.913
2014W1	2D	1	69.5652	78.2609
2014W1	2D	1	43.4783	78.2609
2014W1	2D	1	39.1304	78.2609
2014W1	2D	1	43.4783	82.6087
2014W1	2D	1	65.2174	82.6087
2014W1	2D	1	52.1739	86.9565
2014W1	2D	1	52.1739	86.9565
2014W1	2D	1	82.6087	91.3043
2014W1	2D	1	56.5217	91.3043
2014W2	2D2	1	21.7391	78.2609
2014W2	2D2	1	26.087	47.8261
2014W2	2D2	1	30.4348	69.5652
2014W2	2D2	1	30.4348	73.913
2014W2	2D2	1	30.4348	78.2609
2014W2	2D2	1	30.4348	65.2174
2014W2	2D2	1	30.4348	73.913
2014W2	2D2	1	30.4348	91.3043
2014W2	2D2	1	30.4348	69.5652
2014W2	2D2	1	34.7826	47.8261
2014W2	2D2	1	34.7826	39.1304
2014W2	2D2	1	34.7826	86.9565
2014W2	2D2	1	34.7826	73.913
2014W2	2D2	1	34.7826	82.6087
2014W2	2D2	1	34.7826	65.2174
2014W2	2D2	1	34.7826	34.7826
2014W2	2D2	1	39.1304	78.2609
2014W2	2D2	1	39.1304	86.9565
2014W2	2D2	1	39.1304	86.9565
2014W2	2D2	1	39.1304	60.8696
2014W2	2D2	1	39.1304	65.2174
2014W2	2D2	1	39.1304	78.2609
2014W2	2D2	1	39.1304	47.8261
2014W2	2D2	1	39.1304	56.5217
2014W2	2D2	1	39.1304	56.5217
2014W2	2D2	1	39.1304	47.8261
2014W2	2D2	1	39.1304	43.4783
2014W2	2D2	1	39.1304	43.4783
2014W2	2D2	1	39.1304	47.8261
2014W2	2D2	1	39.1304	39.1304
2014W2	2D2	1	43.4783	82.6087
2014W2	2D2	1	43.4783	65.2174
2014W2	2D2	1	43.4783	69.5652
2014W2	2D2	1	43.4783	56.5217
2014W2	2D2	1	43.4783	56.5217
2014W2	2D2	1	43.4783	52.1739
2014W2	2D2	1	43.4783	69.5652
2014W2	2D2	1	43.4783	60.8696
2014W2	2D2	1	43.4783	47.8261
2014W2	2D2	1	47.8261	60.8696
2014W2	2D2	1	47.8261	65.2174
2014W2	2D2	1	47.8261	69.5652
2014W2	2D2	1	47.8261	56.5217
2014W2	2D2	1	47.8261	78.2609
2014W2	2D2	1	47.8261	65.2174
2014W2	2D2	1	47.8261	65.2174
2014W2	2D2	1	47.8261	56.5217
2014W2	2D2	1	47.8261	65.2174
2014W2	2D2	1	47.8261	30.4348
2014W2	2D2	1	47.8261	52.1739
2014W2	2D2	1	47.8261	52.1739
2014W2	2D2	1	52.1739	73.913
2014W2	2D2	1	52.1739	78.2609
2014W2	2D2	1	52.1739	91.3043
2014W2	2D2	1	52.1739	86.9565
2014W2	2D2	1	52.1739	52.1739
2014W2	2D2	1	52.1739	60.8696
2014W2	2D2	1	56.5217	91.3043
2014W2	2D2	1	56.5217	56.5217
2014W2	2D2	1	56.5217	73.913
2014W2	2D2	1	56.5217	60.8696
2014W2	2D2	1	56.5217	73.913
2014W2	2D2	1	65.2174	69.5652
2014W2	2D2	1	65.2174	86.9565
2014W2	2E	1	47.8261	60.8696
2014W2	2E	1	47.8261	78.2609
2014W2	2E	1	43.4783	69.5652
2014W2	2E	1	52.1739	39.1304
2014W2	2E	1	43.4783	56.5217
2014W2	2E	1	26.087	47.8261
2014W2	2E	1	47.8261	60.8696
2014W2	2E	1	39.1304	52.1739
2014W2	2E	1	56.5217	65.2174
2014W2	2E	1	56.5217	56.5217
2014W2	2E	1	17.3913	69.5652
2014W2	2E	1	56.5217	82.6087
2014W2	2E	1	43.4783	60.8696
2014W2	2E	1	47.8261	52.1739
2014W2	2E	1	39.1304	65.2174
2014W2	2E	1	34.7826	47.8261
2014W2	2E	1	39.1304	69.5652
2014W2	2E	1	52.1739	82.6087
2014W2	2E	1	30.4348	86.9565
2014W2	2E	1	43.4783	65.2174
2014W2	2E	1	34.7826	39.1304
2014W2	2E	1	34.7826	60.8696
2014W2	2E	1	52.1739	60.8696
2014W2	2E	1	43.4783	52.1739
2014W2	2E	1	56.5217	82.6087
2014W2	2E	1	56.5217	73.913
2014W2	2E	1	60.8696	65.2174
2014W2	2E	1	34.7826	73.913
2014W2	2E	1	65.2174	91.3043
2014W2	2E	1	52.1739	73.913
2014W2	2E	1	52.1739	78.2609
2014W2	2E	1	65.2174	78.2609
2014W2	2E	1	34.7826	47.8261
2014W2	2E	1	65.2174	73.913
2014W2	2E	1	47.8261	65.2174
2014W2	2E	1	56.5217	52.1739
2014W2	2E	1	21.7391	56.5217
2014W2	2E	1	43.4783	52.1739
2014W2	2E	1	60.8696	65.2174
2014W2	2E	1	39.1304	65.2174
2014W2	2E	1	39.1304	60.8696
2014W2	2E	1	43.4783	78.2609
2014W2	2E	1	52.1739	52.1739
2014W2	2E	1	47.8261	65.2174
2014W2	2E	1	39.1304	52.1739
2014W2	2E	1	65.2174	82.6087
2014W2	2E	1	34.7826	52.1739
2014W2	2E	1	47.8261	86.9565
2014W2	2E	1	52.1739	69.5652
2014W2	2E	1	39.1304	86.9565
2014W2	2E	1	52.1739	78.2609
2014W2	2E	1	47.8261	65.2174
2014W2	2E	1	47.8261	60.8696
2014W2	2E	1	34.7826	69.5652
2014W2	2E	1	30.4348	52.1739
2014W2	2E	1	43.4783	43.4783
2014W2	2E	1	17.3913	56.5217
2014W2	2E	1	43.4783	52.1739
2014W2	2E	1	43.4783	30.4348
2014W2	2E	1	52.1739	60.8696
2014W2	2E	1	52.1739	86.9565
2014W2	2E	1	56.5217	69.5652
2014W2	2E	1	43.4783	56.5217
2014W2	2E	1	47.8261	60.8696
2014W2	2E	1	39.1304	43.4783
2014W2	2E	1	52.1739	65.2174
2014W2	2E	1	21.7391	39.1304
2014W2	2E	1	34.7826	56.5217
2014W2	2E	1	56.5217	65.2174
2014W2	2E	1	47.8261	47.8261
2014W2	2E	1	39.1304	52.1739
2014W2	2E	1	52.1739	73.913
2014W2	2E	1	56.5217	86.9565
2014W2	2E	1	43.4783	60.8696
2014W2	2E	1	60.8696	60.8696
2014W2	2E	1	43.4783	39.1304
2014W2	2E	1	52.1739	91.3043
2014W2	2E	1	21.7391	56.5217
2014W2	2E	1	26.087	60.8696
2014W2	2E	1	30.4348	69.5652
2014W2	2E	1	34.7826	60.8696
2014W2	2E	1	34.7826	69.5652
2014W2	2E	1	34.7826	43.4783
2014W2	2E	1	39.1304	43.4783
2014W2	2E	1	39.1304	82.6087
2014W2	2E	1	39.1304	69.5652
2014W2	2E	1	39.1304	60.8696
2014W2	2E	1	39.1304	60.8696
2014W2	2E	1	39.1304	43.4783
2014W2	2E	1	39.1304	69.5652
2014W2	2E	1	43.4783	73.913
2014W2	2E	1	43.4783	65.2174
2014W2	2E	1	43.4783	43.4783
2014W2	2E	1	43.4783	86.9565
2014W2	2E	1	43.4783	69.5652
2014W2	2E	1	47.8261	60.8696
2014W2	2E	1	47.8261	73.913
2014W2	2E	1	47.8261	73.913
2014W2	2E	1	47.8261	73.913
2014W2	2E	1	52.1739	82.6087
2014W2	2E	1	52.1739	78.2609
2014W2	2E	1	52.1739	73.913
2014W2	2E	1	52.1739	43.4783
2014W2	2E	1	52.1739	82.6087
2014W2	2E	1	52.1739	52.1739
2014W2	2E	1	56.5217	95.6522
2014W2	2E	1	56.5217	73.913
2014W2	2E	1	56.5217	91.3043
2014W2	2E	1	56.5217	73.913
2014W2	2E	1	60.8696	86.9565
2014W2	2E	1	60.8696	82.6087
2014W2	2E	1	65.2174	69.5652
2014W2	2E	1	65.2174	65.2174
2014W2	2F	1	43.4783	56.5217
2014W2	2F	1	26.087	60.8696
2014W2	2F	1	26.087	73.913
2014W2	2F	1	30.4348	56.5217
2014W2	2F	1	30.4348	56.5217
2014W2	2F	1	30.4348	73.913
2014W2	2F	1	34.7826	43.4783
2014W2	2F	1	34.7826	47.8261
2014W2	2F	1	34.7826	52.1739
2014W2	2F	1	34.7826	60.8696
2014W2	2F	1	34.7826	69.5652
2014W2	2F	1	34.7826	78.2609
2014W2	2F	1	39.1304	39.1304
2014W2	2F	1	39.1304	39.1304
2014W2	2F	1	39.1304	43.4783
2014W2	2F	1	39.1304	43.4783
2014W2	2F	1	39.1304	43.4783
2014W2	2F	1	39.1304	47.8261
2014W2	2F	1	39.1304	52.1739
2014W2	2F	1	39.1304	52.1739
2014W2	2F	1	39.1304	60.8696
2014W2	2F	1	39.1304	60.8696
2014W2	2F	1	39.1304	86.9565
2014W2	2F	1	43.4783	43.4783
2014W2	2F	1	43.4783	43.4783
2014W2	2F	1	43.4783	47.8261
2014W2	2F	1	43.4783	47.8261
2014W2	2F	1	43.4783	52.1739
2014W2	2F	1	43.4783	56.5217
2014W2	2F	1	43.4783	65.2174
2014W2	2F	1	43.4783	65.2174
2014W2	2F	1	43.4783	65.2174
2014W2	2F	1	43.4783	65.2174
2014W2	2F	1	43.4783	65.2174
2014W2	2F	1	43.4783	65.2174
2014W2	2F	1	43.4783	65.2174
2014W2	2F	1	43.4783	65.2174
2014W2	2F	1	43.4783	69.5652
2014W2	2F	1	43.4783	69.5652
2014W2	2F	1	43.4783	82.6087
2014W2	2F	1	47.8261	34.7826
2014W2	2F	1	47.8261	47.8261
2014W2	2F	1	47.8261	56.5217
2014W2	2F	1	47.8261	60.8696
2014W2	2F	1	47.8261	65.2174
2014W2	2F	1	47.8261	73.913
2014W2	2F	1	47.8261	78.2609
2014W2	2F	1	52.1739	39.1304
2014W2	2F	1	52.1739	43.4783
2014W2	2F	1	52.1739	43.4783
2014W2	2F	1	52.1739	43.4783
2014W2	2F	1	52.1739	47.8261
2014W2	2F	1	52.1739	60.8696
2014W2	2F	1	52.1739	65.2174
2014W2	2F	1	52.1739	65.2174
2014W2	2F	1	52.1739	65.2174
2014W2	2F	1	52.1739	69.5652
2014W2	2F	1	52.1739	73.913
2014W2	2F	1	52.1739	73.913
2014W2	2F	1	52.1739	73.913
2014W2	2F	1	56.5217	52.1739
2014W2	2F	1	56.5217	52.1739
2014W2	2F	1	56.5217	56.5217
2014W2	2F	1	56.5217	60.8696
2014W2	2F	1	56.5217	69.5652
2014W2	2F	1	60.8696	56.5217
2014W2	2F	1	60.8696	65.2174
2014W2	2F	1	60.8696	73.913
2014W2	2F	1	60.8696	82.6087
2014W2	2F	1	82.6087	78.2609
2014W1	2G	1	52.1739	52.1739
2014W1	2G	1	47.8261	21.7391
2014W1	2G	1	47.8261	30.4348
2014W1	2G	1	56.5217	30.4348
2014W1	2G	1	30.4348	34.7826
2014W1	2G	1	43.4783	34.7826
2014W1	2G	1	47.8261	34.7826
2014W1	2G	1	39.1304	43.4783
2014W1	2G	1	30.4348	43.4783
2014W1	2G	1	39.1304	43.4783
2014W1	2G	1	34.7826	47.8261
2014W1	2G	1	52.1739	47.8261
2014W1	2G	1	30.4348	47.8261
2014W1	2G	1	34.7826	47.8261
2014W1	2G	1	30.4348	47.8261
2014W1	2G	1	26.087	47.8261
2014W1	2G	1	52.1739	47.8261
2014W1	2G	1	34.7826	47.8261
2014W1	2G	1	52.1739	47.8261
2014W1	2G	1	47.8261	47.8261
2014W1	2G	1	21.7391	52.1739
2014W1	2G	1	39.1304	52.1739
2014W1	2G	1	34.7826	52.1739
2014W1	2G	1	47.8261	52.1739
2014W1	2G	1	34.7826	52.1739
2014W1	2G	1	52.1739	52.1739
2014W1	2G	1	30.4348	52.1739
2014W1	2G	1	39.1304	52.1739
2014W1	2G	1	30.4348	52.1739
2014W1	2G	1	26.087	52.1739
2014W1	2G	1	43.4783	56.5217
2014W1	2G	1	26.087	56.5217
2014W1	2G	1	56.5217	56.5217
2014W1	2G	1	39.1304	56.5217
2014W1	2G	1	39.1304	56.5217
2014W1	2G	1	21.7391	56.5217
2014W1	2G	1	26.087	56.5217
2014W1	2G	1	26.087	56.5217
2014W1	2G	1	34.7826	56.5217
2014W1	2G	1	56.5217	56.5217
2014W1	2G	1	52.1739	60.8696
2014W1	2G	1	43.4783	60.8696
2014W1	2G	1	34.7826	60.8696
2014W1	2G	1	39.1304	60.8696
2014W1	2G	1	39.1304	60.8696
2014W1	2G	1	65.2174	60.8696
2014W1	2G	1	47.8261	60.8696
2014W1	2G	1	34.7826	60.8696
2014W1	2G	1	60.8696	60.8696
2014W1	2G	1	34.7826	60.8696
2014W1	2G	1	47.8261	60.8696
2014W1	2G	1	43.4783	65.2174
2014W1	2G	1	39.1304	65.2174
2014W1	2G	1	30.4348	65.2174
2014W1	2G	1	52.1739	65.2174
2014W1	2G	1	65.2174	65.2174
2014W1	2G	1	43.4783	65.2174
2014W1	2G	1	39.1304	65.2174
2014W1	2G	1	30.4348	65.2174
2014W1	2G	1	34.7826	65.2174
2014W1	2G	1	39.1304	69.5652
2014W1	2G	1	56.5217	69.5652
2014W1	2G	1	34.7826	69.5652
2014W1	2G	1	73.913	69.5652
2014W1	2G	1	47.8261	69.5652
2014W1	2G	1	43.4783	69.5652
2014W1	2G	1	56.5217	69.5652
2014W1	2G	1	43.4783	69.5652
2014W1	2G	1	34.7826	69.5652
2014W1	2G	1	26.087	69.5652
2014W1	2G	1	52.1739	69.5652
2014W1	2G	1	34.7826	69.5652
2014W1	2G	1	56.5217	69.5652
2014W1	2G	1	69.5652	69.5652
2014W1	2G	1	26.087	69.5652
2014W1	2G	1	26.087	69.5652
2014W1	2G	1	30.4348	69.5652
2014W1	2G	1	60.8696	73.913
2014W1	2G	1	30.4348	73.913
2014W1	2G	1	39.1304	73.913
2014W1	2G	1	73.913	73.913
2014W1	2G	1	52.1739	73.913
2014W1	2G	1	56.5217	73.913
2014W1	2G	1	43.4783	73.913
2014W1	2G	1	60.8696	73.913
2014W1	2G	1	39.1304	73.913
2014W1	2G	1	52.1739	73.913
2014W1	2G	1	34.7826	73.913
2014W1	2G	1	34.7826	73.913
2014W1	2G	1	73.913	73.913
2014W1	2G	1	69.5652	73.913
2014W1	2G	1	73.913	73.913
2014W1	2G	1	39.1304	78.2609
2014W1	2G	1	26.087	78.2609
2014W1	2G	1	78.2609	78.2609
2014W1	2G	1	39.1304	78.2609
2014W1	2G	1	43.4783	78.2609
2014W1	2G	1	47.8261	82.6087
2014W1	2G	1	34.7826	82.6087
2014W1	2G	1	47.8261	82.6087
2014W1	2G	1	52.1739	82.6087
2014W1	2G	1	65.2174	82.6087
2014W1	2G	1	56.5217	86.9565
2014W1	2G	1	34.7826	86.9565
2014W1	2G	1	39.1304	86.9565
2014W1	2G	1	43.4783	86.9565
2014W1	2G	1	39.1304	86.9565
2014W1	2G	1	39.1304	86.9565
2014W1	2G	1	60.8696	86.9565
2014W1	2G	1	30.4348	86.9565
2014W1	2G	1	65.2174	91.3043
2014W1	2G	1	91.3043	91.3043
2014W2	2H	1	26.087	60.8696
2014W2	2H	1	34.7826	47.8261
2014W2	2H	1	34.7826	39.1304
2014W2	2H	1	34.7826	60.8696
2014W2	2H	1	34.7826	47.8261
2014W2	2H	1	34.7826	60.8696
2014W2	2H	1	34.7826	65.2174
2014W2	2H	1	34.7826	56.5217
2014W2	2H	1	34.7826	34.7826
2014W2	2H	1	39.1304	52.1739
2014W2	2H	1	39.1304	78.2609
2014W2	2H	1	39.1304	17.3913
2014W2	2H	1	39.1304	69.5652
2014W2	2H	1	39.1304	60.8696
2014W2	2H	1	39.1304	47.8261
2014W2	2H	1	43.4783	56.5217
2014W2	2H	1	43.4783	39.1304
2014W2	2H	1	43.4783	39.1304
2014W2	2H	1	43.4783	69.5652
2014W2	2H	1	43.4783	60.8696
2014W2	2H	1	43.4783	43.4783
2014W2	2H	1	43.4783	65.2174
2014W2	2H	1	43.4783	43.4783
2014W2	2H	1	43.4783	65.2174
2014W2	2H	1	47.8261	47.8261
2014W2	2H	1	47.8261	56.5217
2014W2	2H	1	47.8261	43.4783
2014W2	2H	1	47.8261	47.8261
2014W2	2H	1	47.8261	69.5652
2014W2	2H	1	47.8261	65.2174
2014W2	2H	1	47.8261	34.7826
2014W2	2H	1	47.8261	52.1739
2014W2	2H	1	52.1739	69.5652
2014W2	2H	1	52.1739	52.1739
2014W2	2H	1	52.1739	65.2174
2014W2	2H	1	52.1739	86.9565
2014W2	2H	1	52.1739	47.8261
2014W2	2H	1	52.1739	52.1739
2014W2	2H	1	52.1739	60.8696
2014W2	2H	1	56.5217	78.2609
2014W2	2H	1	56.5217	60.8696
2014W2	2H	1	56.5217	52.1739
2014W2	2H	1	56.5217	52.1739
2014W2	2H	1	60.8696	73.913
2014W2	2H	1	60.8696	86.9565
2014W2	2H	1	60.8696	60.8696
2014W2	2H	1	65.2174	52.1739
2014W2	2H	1	73.913	69.5652
2014W2	2H	1	73.913	86.9565
2014W1	3A	2	22.2222	66.6667
2014W1	3A	2	44.4444	77.7778
2014W1	3A	2	88.8889	88.8889
2014W1	3A	2	55.5556	44.4444
2014W1	3A	2	44.4444	88.8889
2014W1	3A	2	11.1111	44.4444
2014W1	3A	2	33.3333	88.8889
2014W1	3A	2	22.2222	66.6667
2014W1	3A	2	0	66.6667
2014W1	3A	2	33.3333	0
2014W1	3A	2	22.2222	11.1111
2014W1	3A	2	66.6667	66.6667
2014W1	3A	2	88.8889	77.7778
2014W1	3A	2	22.2222	88.8889
2014W1	3A	2	55.5556	55.5556
2014W1	3A	2	44.4444	66.6667
2014W1	3A	2	44.4444	55.5556
2014W1	3A	2	44.4444	77.7778
2014W1	3A	2	33.3333	100
2014W1	3A	2	33.3333	55.5556
2014W1	3A	2	100	100
2014W1	3A	2	22.2222	44.4444
2014W1	3A	2	55.5556	66.6667
2014W1	3A	2	55.5556	55.5556
2014W1	3A	2	77.7778	100
2014W1	3A	2	66.6667	66.6667
2014W1	3A	2	55.5556	55.5556
2014W1	3A	2	88.8889	88.8889
2014W1	3A	2	55.5556	77.7778
2014W1	3A	2	44.4444	88.8889
2014W1	3A	2	44.4444	77.7778
2014W1	3A	2	33.3333	55.5556
2014W1	3A	2	44.4444	44.4444
2014W1	3A	2	33.3333	66.6667
2014W1	3A	2	44.4444	44.4444
2014W1	3A	2	55.5556	88.8889
2014W1	3A	2	22.2222	66.6667
2014W1	3A	2	77.7778	77.7778
2014W1	3A	2	77.7778	100
2014W1	3A	2	44.4444	55.5556
2014W1	3A	2	66.6667	77.7778
2014W1	3A	2	44.4444	55.5556
2014W1	3A	2	55.5556	88.8889
2014W1	3A	2	44.4444	77.7778
2014W1	3A	2	44.4444	55.5556
2014W1	3A	2	11.1111	44.4444
2014W1	3A	2	44.4444	66.6667
2014W1	3A	2	33.3333	77.7778
2014W1	3A	2	44.4444	88.8889
2014W1	3A	2	55.5556	77.7778
2014W1	3A	2	55.5556	66.6667
2014W1	3A	2	33.3333	55.5556
2014W1	3A	2	55.5556	77.7778
2014W1	3A	2	66.6667	66.6667
2014W1	3A	2	66.6667	77.7778
2014W1	3A	2	55.5556	44.4444
2014W1	3A	2	44.4444	77.7778
2014W1	3A	2	33.3333	77.7778
2014W1	3A	2	66.6667	88.8889
2014W1	3A	2	55.5556	77.7778
2014W1	3A	2	55.5556	44.4444
2014W1	3A	2	22.2222	44.4444
2014W1	3A	2	66.6667	100
2014W1	3A	2	33.3333	77.7778
2014W1	3A	2	88.8889	100
2014W1	3A	2	33.3333	66.6667
2014W1	3A	2	44.4444	88.8889
2014W1	3A	2	55.5556	88.8889
2014W1	3A	2	22.2222	33.3333
2014W1	3A	2	44.4444	44.4444
2014W1	3A	2	55.5556	33.3333
2014W1	3A	2	55.5556	88.8889
2014W1	3A	2	44.4444	77.7778
2014W1	3A	2	66.6667	88.8889
2014W1	3A	2	66.6667	77.7778
2014W1	3A	2	44.4444	77.7778
2014W1	3A	2	55.5556	100
2014W1	3A	2	55.5556	66.6667
2014W1	3A	2	33.3333	66.6667
2014W1	3A	2	33.3333	66.6667
2014W1	3A	2	55.5556	66.6667
2014W1	3A	2	88.8889	66.6667
2014W1	3A	2	22.2222	11.1111
2014W1	3A	2	22.2222	66.6667
2014W1	3A	2	55.5556	77.7778
2014W1	3A	2	33.3333	100
2014W1	3A	2	77.7778	77.7778
2014W1	3A	2	44.4444	66.6667
2014W1	3A	2	22.2222	77.7778
2014W1	3A	2	88.8889	77.7778
2014W1	3A	2	44.4444	66.6667
2014W1	3A	2	33.3333	55.5556
2014W1	3A	2	33.3333	77.7778
2014W1	3A	2	22.2222	77.7778
2014W1	3A	2	66.6667	77.7778
2014W1	3A	2	55.5556	77.7778
2014W1	3A	2	55.5556	66.6667
2014W1	3A	2	33.3333	44.4444
2014W1	3A	2	44.4444	77.7778
2014W1	3A	2	55.5556	88.8889
2014W1	3A	2	88.8889	88.8889
2014W1	3A	2	33.3333	55.5556
2014W1	3A	2	77.7778	88.8889
2014W1	3A	2	66.6667	77.7778
2014W1	3A	2	22.2222	55.5556
2014W1	3A	2	44.4444	22.2222
2014W1	3A	2	66.6667	77.7778
2014W1	3A	2	11.1111	33.3333
2014W1	3A	2	55.5556	66.6667
2014W1	3A	2	55.5556	66.6667
2014W1	3A	2	55.5556	55.5556
2014W1	3A	2	55.5556	55.5556
2014W1	3A	2	33.3333	55.5556
2014W1	3A	2	55.5556	77.7778
2014W1	3A	2	77.7778	100
2014W1	3A	2	66.6667	88.8889
2014W1	3A	2	44.4444	77.7778
2014W1	3A	2	55.5556	88.8889
2014W1	3A	2	44.4444	66.6667
2014W1	3A	2	44.4444	88.8889
2014W1	3A	2	22.2222	55.5556
2014W1	3A	2	44.4444	44.4444
2014W1	3A	2	66.6667	33.3333
2014W1	3A	2	44.4444	66.6667
2014W1	3A	2	88.8889	77.7778
2014W1	3A	2	55.5556	66.6667
2014W1	3A	2	33.3333	44.4444
2014W1	3A	2	55.5556	77.7778
2014W1	3A	2	33.3333	55.5556
2014W1	3A	2	22.2222	88.8889
2014W1	3A	2	33.3333	66.6667
2014W1	3A	2	22.2222	44.4444
2014W1	3A	2	33.3333	66.6667
2014W1	3A	2	66.6667	77.7778
2014W1	3A	2	44.4444	77.7778
2014W1	3A	2	44.4444	66.6667
2014W1	3A	2	55.5556	77.7778
2014W1	3A	2	66.6667	77.7778
2014W1	3A	2	44.4444	88.8889
2014W1	3A	2	44.4444	55.5556
2014W1	3A	2	66.6667	44.4444
2014W1	3A	2	33.3333	44.4444
2014W1	3A	2	77.7778	88.8889
2014W1	3A	2	44.4444	66.6667
2014W1	3A	2	55.5556	77.7778
2014W1	3A	2	77.7778	100
2014W1	3A	2	66.6667	77.7778
2014W1	3A	2	33.3333	55.5556
2014W1	3A	2	33.3333	55.5556
2014W1	3A	2	44.4444	88.8889
2014W1	3A	2	55.5556	77.7778
2014W1	3A	2	22.2222	77.7778
2014W1	3A	2	22.2222	55.5556
2014W1	3A	2	44.4444	66.6667
2014W1	3A	2	44.4444	66.6667
2014W1	3A	2	33.3333	44.4444
2014W1	3A	2	44.4444	77.7778
2014W1	3A	2	55.5556	66.6667
2014W1	3B	2	0	22.2222
2014W1	3B	2	22.2222	77.7778
2014W1	3B	2	22.2222	55.5556
2014W1	3B	2	11.1111	55.5556
2014W1	3B	2	66.6667	55.5556
2014W1	3B	2	55.5556	77.7778
2014W1	3B	2	33.3333	33.3333
2014W1	3B	2	33.3333	55.5556
2014W1	3B	2	11.1111	55.5556
2014W1	3B	2	66.6667	77.7778
2014W1	3B	2	44.4444	66.6667
2014W1	3B	2	33.3333	22.2222
2014W1	3B	2	44.4444	77.7778
2014W1	3B	2	66.6667	66.6667
2014W1	3B	2	55.5556	77.7778
2014W1	3B	2	55.5556	66.6667
2014W1	3B	2	44.4444	77.7778
2014W1	3B	2	66.6667	66.6667
2014W1	3B	2	55.5556	77.7778
2014W1	3B	2	44.4444	77.7778
2014W1	3B	2	22.2222	22.2222
2014W1	3B	2	22.2222	88.8889
2014W1	3B	2	33.3333	77.7778
2014W1	3B	2	44.4444	55.5556
2014W1	3B	2	33.3333	88.8889
2014W1	3B	2	55.5556	88.8889
2014W1	3B	2	33.3333	77.7778
2014W1	3B	2	77.7778	100
2014W1	3B	2	66.6667	77.7778
2014W1	3B	2	66.6667	77.7778
2014W1	3B	2	44.4444	44.4444
2014W1	3B	2	22.2222	77.7778
2014W1	3B	2	22.2222	100
2014W1	3B	2	44.4444	55.5556
2014W1	3B	2	66.6667	77.7778
2014W1	3B	2	22.2222	66.6667
2014W1	3B	2	66.6667	77.7778
2014W1	3B	2	44.4444	44.4444
2014W1	3B	2	33.3333	88.8889
2014W1	3B	2	55.5556	88.8889
2014W1	3B	2	44.4444	55.5556
2014W1	3B	2	33.3333	44.4444
2014W1	3B	2	77.7778	88.8889
2014W1	3B	2	55.5556	88.8889
2014W1	3B	2	44.4444	77.7778
2014W1	3B	2	66.6667	55.5556
2014W1	3B	2	77.7778	88.8889
2014W1	3B	2	55.5556	88.8889
2014W1	3B	2	55.5556	66.6667
2014W1	3B	2	33.3333	66.6667
2014W1	3B	2	22.2222	77.7778
2014W1	3B	2	22.2222	55.5556
2014W1	3B	2	44.4444	55.5556
2014W1	3B	2	44.4444	88.8889
2014W1	3B	2	11.1111	33.3333
2014W1	3B	2	66.6667	77.7778
2014W1	3B	2	33.3333	44.4444
2014W1	3B	2	33.3333	66.6667
2014W1	3B	2	33.3333	77.7778
2014W1	3B	2	22.2222	33.3333
2014W1	3B	2	88.8889	77.7778
2014W1	3B	2	55.5556	77.7778
2014W1	3B	2	66.6667	88.8889
2014W1	3B	2	44.4444	66.6667
2014W1	3B	2	55.5556	66.6667
2014W1	3B	2	44.4444	66.6667
2014W1	3B	2	33.3333	77.7778
2014W1	3B	2	44.4444	66.6667
2014W1	3B	2	44.4444	66.6667
2014W1	3B	2	55.5556	66.6667
2014W1	3B	2	44.4444	66.6667
2014W1	3B	2	77.7778	77.7778
2014W1	3B	2	66.6667	66.6667
2014W1	3B	2	44.4444	88.8889
2014W1	3B	2	33.3333	55.5556
2014W1	3B	2	66.6667	88.8889
2014W1	3B	2	66.6667	55.5556
2014W1	3B	2	66.6667	55.5556
2014W1	3B	2	33.3333	66.6667
2014W1	3B	2	44.4444	66.6667
2014W1	3B	2	44.4444	66.6667
2014W1	3B	2	33.3333	88.8889
2014W1	3B	2	66.6667	11.1111
2014W1	3B	2	22.2222	77.7778
2014W1	3B	2	55.5556	88.8889
2014W1	3B	2	55.5556	44.4444
2014W1	3B	2	33.3333	55.5556
2014W1	3B	2	33.3333	88.8889
2014W1	3B	2	44.4444	55.5556
2014W1	3B	2	44.4444	66.6667
2014W1	3B	2	44.4444	88.8889
2014W1	3B	2	66.6667	77.7778
2014W1	3B	2	77.7778	66.6667
2014W1	3B	2	33.3333	55.5556
2014W1	3B	2	11.1111	22.2222
2014W1	3B	2	55.5556	88.8889
2014W1	3B	2	44.4444	55.5556
2014W1	3B	2	11.1111	44.4444
2014W1	3B	2	11.1111	88.8889
2014W1	3B	2	44.4444	44.4444
2014W1	3B	2	66.6667	55.5556
2014W1	3B	2	33.3333	77.7778
2014W1	3B	2	44.4444	88.8889
2014W1	3B	2	33.3333	88.8889
2014W1	3B	2	66.6667	88.8889
2014W1	3B	2	44.4444	0
2014W1	3B	2	77.7778	88.8889
2014W1	3B	2	11.1111	77.7778
2014W1	3B	2	44.4444	55.5556
2014W1	3B	2	33.3333	77.7778
2014W1	3B	2	11.1111	55.5556
2014W1	3B	2	55.5556	88.8889
2014W1	3B	2	55.5556	88.8889
2014W1	3B	2	55.5556	66.6667
2014W1	3B	2	33.3333	77.7778
2014W1	3B	2	55.5556	22.2222
2014W1	3B	2	22.2222	55.5556
2014W1	3B	2	33.3333	55.5556
2014W1	3B	2	0	66.6667
2014W1	3B	2	66.6667	66.6667
2014W1	3B	2	55.5556	44.4444
2014W1	3B	2	33.3333	55.5556
2014W1	3B	2	44.4444	44.4444
2014W1	3B	2	77.7778	88.8889
2014W1	3B	2	55.5556	88.8889
2014W1	3B	2	55.5556	55.5556
2014W1	3B	2	55.5556	77.7778
2014W1	3B	2	44.4444	55.5556
2014W1	3B	2	55.5556	55.5556
2014W1	3B	2	66.6667	88.8889
2014W1	3B	2	77.7778	66.6667
2014W1	3B	2	55.5556	55.5556
2014W1	3B	2	55.5556	66.6667
2014W1	3B	2	88.8889	88.8889
2014W1	3B	2	22.2222	66.6667
2014W1	3B	2	77.7778	88.8889
2014W1	3B	2	44.4444	55.5556
2014W1	3B	2	66.6667	22.2222
2014W1	3B	2	44.4444	100
2014W1	3B	2	55.5556	66.6667
2014W1	3B	2	22.2222	77.7778
2014W1	3B	2	11.1111	44.4444
2014W1	3B	2	77.7778	100
2014W1	3B	2	22.2222	55.5556
2014W1	3B	2	22.2222	55.5556
2014W1	3B	2	55.5556	88.8889
2014W1	3B	2	33.3333	44.4444
2014W1	3B	2	44.4444	55.5556
2014W1	3B	2	88.8889	77.7778
2014W1	3B	2	88.8889	77.7778
2014W1	3B	2	77.7778	77.7778
2014W1	3B	2	22.2222	44.4444
2014W1	3B	2	55.5556	66.6667
2014W1	3B	2	55.5556	77.7778
2014W1	3B	2	33.3333	77.7778
2014W1	3B	2	22.2222	44.4444
2014W1	3B	2	66.6667	66.6667
2014W1	3B	2	44.4444	0
2014W1	3C	2	22.2222	77.7778
2014W1	3C	2	44.4444	77.7778
2014W1	3C	2	55.5556	55.5556
2014W1	3C	2	55.5556	66.6667
2014W1	3C	2	22.2222	77.7778
2014W1	3C	2	33.3333	77.7778
2014W1	3C	2	77.7778	55.5556
2014W1	3C	2	33.3333	77.7778
2014W1	3C	2	33.3333	55.5556
2014W1	3C	2	55.5556	44.4444
2014W1	3C	2	11.1111	66.6667
2014W1	3C	2	33.3333	55.5556
2014W1	3C	2	88.8889	77.7778
2014W1	3C	2	55.5556	100
2014W1	3C	2	33.3333	77.7778
2014W1	3C	2	33.3333	33.3333
2014W1	3C	2	55.5556	44.4444
2014W1	3C	2	33.3333	66.6667
2014W1	3C	2	44.4444	66.6667
2014W1	3C	2	66.6667	88.8889
2014W1	3C	2	33.3333	88.8889
2014W1	3C	2	33.3333	88.8889
2014W1	3C	2	55.5556	77.7778
2014W1	3C	2	55.5556	66.6667
2014W1	3C	2	44.4444	55.5556
2014W1	3C	2	77.7778	100
2014W1	3C	2	33.3333	77.7778
2014W1	3C	2	55.5556	55.5556
2014W1	3C	2	55.5556	55.5556
2014W1	3C	2	55.5556	100
2014W1	3C	2	55.5556	77.7778
2014W1	3C	2	66.6667	88.8889
2014W1	3C	2	55.5556	44.4444
2014W1	3C	2	44.4444	77.7778
2014W1	3C	2	44.4444	44.4444
2014W1	3C	2	77.7778	77.7778
2014W1	3C	2	66.6667	77.7778
2014W1	3C	2	33.3333	55.5556
2014W1	3C	2	44.4444	66.6667
2014W1	3C	2	55.5556	44.4444
2014W1	3C	2	44.4444	55.5556
2014W1	3C	2	11.1111	33.3333
2014W1	3C	2	66.6667	66.6667
2014W1	3C	2	22.2222	77.7778
2014W1	3C	2	11.1111	44.4444
2014W1	3C	2	44.4444	88.8889
2014W1	3C	2	22.2222	55.5556
2014W1	3C	2	55.5556	66.6667
2014W1	3C	2	55.5556	55.5556
2014W1	3C	2	55.5556	77.7778
2014W1	3C	2	55.5556	100
2014W1	3C	2	66.6667	77.7778
2014W1	3C	2	33.3333	66.6667
2014W1	3C	2	33.3333	77.7778
2014W1	3C	2	77.7778	88.8889
2014W1	3C	2	33.3333	44.4444
2014W1	3C	2	33.3333	55.5556
2014W1	3C	2	44.4444	77.7778
2014W1	3C	2	55.5556	44.4444
2014W1	3C	2	55.5556	44.4444
2014W1	3C	2	44.4444	55.5556
2014W1	3C	2	88.8889	88.8889
2014W1	3C	2	77.7778	66.6667
2014W1	3C	2	33.3333	44.4444
2014W1	3C	2	44.4444	22.2222
2014W1	3C	2	33.3333	44.4444
2014W1	3C	2	11.1111	33.3333
2014W1	3C	2	66.6667	77.7778
2014W1	3C	2	55.5556	77.7778
2014W1	3C	2	33.3333	55.5556
2014W1	3C	2	44.4444	77.7778
2014W1	3C	2	66.6667	88.8889
2014W1	3C	2	0	33.3333
2014W1	3C	2	66.6667	55.5556
2014W1	3C	2	55.5556	88.8889
2014W1	3C	2	66.6667	77.7778
2014W1	3C	2	33.3333	66.6667
2014W1	3C	2	55.5556	66.6667
2014W1	3C	2	33.3333	55.5556
2014W1	3C	2	55.5556	66.6667
2014W1	3C	2	55.5556	66.6667
2014W1	3C	2	55.5556	44.4444
2014W1	3C	2	44.4444	77.7778
2014W1	3C	2	22.2222	33.3333
2014W1	3C	2	66.6667	77.7778
2014W1	3C	2	11.1111	66.6667
2014W1	3C	2	44.4444	55.5556
2014W1	3C	2	44.4444	44.4444
2014W1	3C	2	33.3333	55.5556
2014W1	3C	2	44.4444	55.5556
2014W1	3C	2	77.7778	100
2014W1	3C	2	44.4444	0
2014W1	3C	2	44.4444	55.5556
2014W1	3C	2	66.6667	77.7778
2014W1	3C	2	0	0
2014W1	3C	2	66.6667	77.7778
2014W1	3C	2	44.4444	44.4444
2014W1	3C	2	44.4444	66.6667
2014W1	3C	2	44.4444	55.5556
2014W1	3C	2	44.4444	66.6667
2014W1	3C	2	55.5556	88.8889
2014W1	3C	2	66.6667	55.5556
2014W1	3C	2	44.4444	22.2222
2014W1	3C	2	44.4444	44.4444
2014W1	3C	2	44.4444	44.4444
2014W1	3C	2	33.3333	33.3333
2014W1	3C	2	66.6667	66.6667
2014W1	3C	2	44.4444	11.1111
2014W1	3C	2	22.2222	55.5556
2014W1	3C	2	44.4444	88.8889
2014W1	3C	2	66.6667	77.7778
2014W1	3C	2	77.7778	88.8889
2014W1	3C	2	55.5556	77.7778
2014W1	3C	2	66.6667	77.7778
2014W1	3C	2	11.1111	44.4444
2014W1	3C	2	22.2222	88.8889
2014W1	3C	2	55.5556	55.5556
2014W1	3C	2	33.3333	66.6667
2014W1	3C	2	55.5556	55.5556
2014W1	3C	2	55.5556	66.6667
2014W1	3C	2	44.4444	88.8889
2014W1	3C	2	66.6667	77.7778
2014W1	3C	2	55.5556	66.6667
2014W1	3C	2	33.3333	44.4444
2014W1	3C	2	55.5556	77.7778
2014W1	3C	2	55.5556	55.5556
2014W1	3C	2	66.6667	77.7778
2014W1	3C	2	22.2222	77.7778
2014W1	3C	2	11.1111	44.4444
2014W1	3C	2	55.5556	66.6667
2014W1	3C	2	33.3333	55.5556
2014W1	3C	2	44.4444	77.7778
2014W1	3C	2	55.5556	66.6667
2014W1	3C	2	0	33.3333
2014W1	3C	2	55.5556	0
2014W1	3C	2	55.5556	0
2014W1	3C	2	33.3333	22.2222
2014W1	3C	2	55.5556	66.6667
2014W1	3C	2	55.5556	33.3333
2014W1	3C	2	55.5556	77.7778
2014W1	3C	2	22.2222	66.6667
2014W1	3C	2	55.5556	66.6667
2014W1	3C	2	44.4444	77.7778
2014W1	3C	2	44.4444	100
2014W1	3C	2	44.4444	55.5556
2014W1	3C	2	44.4444	66.6667
2014W1	3C	2	22.2222	77.7778
2014W1	3C	2	22.2222	77.7778
2014W1	3C	2	44.4444	77.7778
2014W1	3C	2	55.5556	77.7778
2014W1	3C	2	22.2222	66.6667
2014W1	3C	2	44.4444	44.4444
2014W1	3C	2	44.4444	44.4444
2014W1	3C	2	66.6667	55.5556
2014W1	3C	2	11.1111	44.4444
2014W1	3C	2	33.3333	66.6667
2014W1	3C	2	33.3333	66.6667
2014W1	3C	2	77.7778	100
2014W1	3C	2	44.4444	77.7778
2014W1	3C	2	55.5556	77.7778
2014W1	3C	2	33.3333	11.1111
2014W1	3C	2	44.4444	100
2014W1	3C	2	44.4444	66.6667
2014W1	3C	2	44.4444	77.7778
2014W1	3C	2	55.5556	77.7778
2014W1	3C	2	44.4444	77.7778
2014W1	3C	2	77.7778	100
2014W1	3C	2	55.5556	55.5556
2014W1	3D	2	33.3333	77.7778
2014W1	3D	2	55.5556	100
2014W1	3D	2	33.3333	0
2014W1	3D	2	55.5556	66.6667
2014W1	3D	2	66.6667	88.8889
2014W1	3D	2	22.2222	44.4444
2014W1	3D	2	44.4444	0
2014W1	3D	2	44.4444	77.7778
2014W1	3D	2	33.3333	77.7778
2014W1	3D	2	44.4444	66.6667
2014W1	3D	2	55.5556	77.7778
2014W1	3D	2	55.5556	55.5556
2014W1	3D	2	55.5556	88.8889
2014W1	3D	2	22.2222	22.2222
2014W1	3D	2	33.3333	0
2014W1	3D	2	55.5556	22.2222
2014W1	3D	2	88.8889	77.7778
2014W1	3D	2	22.2222	66.6667
2014W1	3D	2	88.8889	100
2014W1	3D	2	44.4444	77.7778
2014W1	3D	2	11.1111	55.5556
2014W1	3D	2	55.5556	0
2014W1	3D	2	55.5556	77.7778
2014W1	3D	2	55.5556	55.5556
2014W1	3D	2	55.5556	66.6667
2014W1	3D	2	66.6667	11.1111
2014W1	3D	2	55.5556	0
2014W1	3D	2	66.6667	0
2014W1	3D	2	55.5556	77.7778
2014W1	3D	2	44.4444	55.5556
2014W1	3D	2	22.2222	44.4444
2014W1	3D	2	44.4444	11.1111
2014W1	3D	2	44.4444	77.7778
2014W1	3D	2	77.7778	77.7778
2014W1	3D	2	66.6667	100
2014W1	3D	2	55.5556	0
2014W1	3D	2	88.8889	77.7778
2014W1	3D	2	77.7778	100
2014W1	3D	2	66.6667	66.6667
2014W1	3D	2	44.4444	33.3333
2014W1	3D	2	66.6667	66.6667
2014W1	3D	2	22.2222	33.3333
2014W1	3D	2	44.4444	100
2014W1	3D	2	77.7778	0
2014W1	3D	2	77.7778	55.5556
2014W1	3D	2	44.4444	0
2014W1	3D	2	55.5556	77.7778
2014W1	3D	2	44.4444	55.5556
2014W1	3D	2	33.3333	44.4444
2014W1	3D	2	33.3333	44.4444
2014W1	3D	2	22.2222	66.6667
2014W1	3D	2	22.2222	33.3333
2014W1	3D	2	44.4444	0
2014W1	3D	2	44.4444	44.4444
2014W1	3D	2	22.2222	55.5556
2014W1	3D	2	44.4444	66.6667
2014W1	3D	2	22.2222	44.4444
2014W1	3D	2	66.6667	66.6667
2014W1	3D	2	22.2222	11.1111
2014W1	3D	2	22.2222	77.7778
2014W1	3D	2	44.4444	88.8889
2014W1	3D	2	66.6667	77.7778
2014W1	3D	2	33.3333	22.2222
2014W1	3D	2	33.3333	66.6667
2014W1	3D	2	44.4444	66.6667
2014W1	3D	2	77.7778	55.5556
2014W1	3D	2	11.1111	55.5556
2014W1	3D	2	55.5556	22.2222
2014W1	3D	2	55.5556	44.4444
2014W1	3D	2	88.8889	0
2014W1	3D	2	55.5556	22.2222
2014W1	3D	2	44.4444	0
2014W1	3D	2	55.5556	0
2014W1	3D	2	33.3333	0
2014W1	3D	2	11.1111	0
2014W1	3D	2	33.3333	55.5556
2014W1	3D	2	55.5556	77.7778
2014W1	3D	2	44.4444	0
2014W1	3D	2	33.3333	66.6667
2014W1	3D	2	55.5556	66.6667
2014W1	3D	2	44.4444	66.6667
2014W1	3D	2	77.7778	77.7778
2014W1	3D	2	55.5556	88.8889
2014W1	3D	2	55.5556	0
[truncated: 1,666 more rows]
